1 **A genetic bottleneck of mitochondrial DNA during human**  
2 **lymphocyte development**

3 Zhongjie Tang<sup>1, #</sup>, Zhaolian Lu<sup>2, #</sup>, Baizhen Chen<sup>1</sup>, Weixing Zhang<sup>1</sup>, Howard Y. Chang<sup>3,4,5, \*</sup>,  
4 Zheng Hu<sup>2, \*</sup>, Jin Xu<sup>1, \*</sup>

5

6 <sup>1</sup> State Key Laboratory of Biocontrol, School of Life Sciences, Sun Yat-Sen University,  
7 Guangzhou, China.

8 <sup>2</sup> CAS Key Laboratory of Quantitative Engineering Biology, Shenzhen Institute of Synthetic  
9 Biology, Shenzhen Institutes of Advanced Technology, Chinese Academy of Sciences,  
10 Shenzhen 518055, China.

11 <sup>3</sup> Center for Personal Dynamic Regulomes, Stanford University, United States.

12 <sup>4</sup> Departments of Dermatology and Genetics, Stanford University School of Medicine, United  
13 States.

14 <sup>5</sup> Howard Hughes Medical Institute, Stanford University, United States.

15

16

17 \* Correspondence to H.Y.C. at: [howchang@stanford.edu](mailto:howchang@stanford.edu), Z.H. at: [zheng.hu@siat.ac.cn](mailto:zheng.hu@siat.ac.cn) and  
18 J.X. at: [xujin7@mail.sysu.edu.cn](mailto:xujin7@mail.sysu.edu.cn)

19 # These authors contributed equally to the work.

20 **ABSTRACT**

21 Mitochondria are essential organelles in eukaryotic cells that provide critical support  
22 for energetic and metabolic homeostasis. Mutations that accumulate in mitochondrial  
23 DNA (mtDNA) in somatic cells have been implicated in cancer, degenerative diseases,  
24 and the aging process. However, the mechanisms used by somatic cells to maintain  
25 proper functions despite their mtDNA mutation load are poorly understood. Here, we  
26 analyzed somatic mtDNA mutations in more than 30,000 human single peripheral and  
27 bone marrow mononuclear cells and observed a significant overrepresentation of  
28 homoplasmic mtDNA mutations in B, T and NK lymphocytes despite their lower  
29 mutational burden than other hematopoietic cells. The characteristic mutational  
30 landscape of mtDNA in lymphocytes were validated with data from multiple platforms  
31 and individuals. Single-cell RNA-seq and computational modeling demonstrated a  
32 stringent mitochondrial bottleneck during lymphocyte development likely caused by  
33 lagging mtDNA replication relative to cell proliferation. These results illuminate a  
34 potential mechanism used by highly metabolically active immune cells for quality  
35 control of their mitochondrial genomes.

## 36 INTRODUCTION

37 Mitochondrial DNA (mtDNA) encodes genes involved in oxidative phosphorylation that  
38 are essential for eukaryotic cells<sup>1</sup>. There are typically hundreds to thousands of copies  
39 of mtDNA molecules in each cell and the germline mtDNA is predominantly maternally  
40 inherited and does not undergo recombination<sup>2</sup>. mtDNA accumulates mutations at a  
41 rate that is five to ten times higher per site than the nuclear genome because the lack  
42 of DNA repair systems<sup>3,4</sup> and frequent contact with mutagenic reactive oxygen species  
43 (ROS)<sup>5</sup>. More than 500 pathogenic mtDNA mutations have been identified as causative  
44 genetic defects of various human diseases<sup>6</sup>. According to the theory known as  
45 “Muller’s ratchet,” continuous accumulation of deleterious mutations in the absence of  
46 purifying selection will lead to a decline in population fitness and will ultimately result  
47 in mutational meltdown<sup>7</sup>. To avoid this outcome, the animal germline has evolved a  
48 mitochondrial genetic bottleneck, wherein only a small subset of mtDNA is transmitted  
49 to the next generation, thus resulting in significant removal of deleterious mutations<sup>8-</sup>  
50 <sup>10</sup>. Population studies have also revealed an increase in mtDNA heteroplasmy in blood  
51 cells as part of the normal aging process<sup>11</sup> and the accumulation of pathogenic mtDNA  
52 mutations has been reported in cancers and neurodegenerative disorders<sup>12,13</sup>.  
53 However, the transmission and clonal dynamics of somatic mtDNA mutations along  
54 tissue development are largely unknown, due to the technical difficulties of detecting  
55 heteroplasmic mutations in single cells.

56

57 We and others have recently developed a single-cell lineage tracing method leveraging  
58 the somatic mtDNA mutations detected in single-cell assay for transposase-accessible  
59 chromatin with high-throughput sequencing (scATAC-seq) and/or RNA-seq (scRNA-  
60 seq) data<sup>14,15</sup>. Using this method, a recent study had shown that a pathogenic mutation  
61 3243A/G, the cause of mitochondrial myopathy, encephalopathy, lactic acidosis, and  
62 stroke-like episode (MELAS)<sup>16</sup>, was remarkably purified in T cells as compared to other  
63 blood cells from peripheral blood mononuclear cells (PBMCs), with unknown  
64 mechanisms. These results inspired our investigation of the mtDNA mutational  
65 landscape in a large population of single cells in order to understand the clonal  
66 dynamics of mtDNA in the development of somatic cell lineages.

## 67 RESULTS

### 68 Somatic mutational landscape of mtDNA at single-cell resolution

69 In this study, we focused on human hematopoietic system where the cellular  
70 differentiation lineages have been well documented. We first identified somatic mtDNA  
71 mutations in a previously reported mitochondrial scATAC-seq (or mtscATAC-seq)  
72 dataset including more than 20,000 blood cells from a healthy 47-year-old individual<sup>17</sup>  
73 (**Fig. 1a-b, Extended Data Fig. 1a, Methods**). We summarized the numbers of  
74 mutations and the variant allele frequency (VAF, also referred to as mtDNA  
75 heteroplasmic ratio) in each cell in order to compare the VAF distribution in a population  
76 of different cell types. Interestingly, we found cells of the mature lymphocyte lineages-  
77 -specifically B, T, NK cells--carried a significantly lower mtDNA mutational burden as  
78 compared to those identified in hematopoietic progenitor cells, including hematopoietic  
79 stem cells (HSCs), multipotent progenitors (MPPs), lymphoid-primed multipotent  
80 progenitors (LMPPs), common lymphoid progenitors (CLPs), common myeloid  
81 progenitors (CMPs), and granulocyte-macrophage progenitors (GMPs) (**Fig. 1c and**  
82 **Extended Data Fig. 1b**, Wilcoxon test,  $p < 2.2e^{-16}$ ). The mtDNA mutational burden was  
83 also lower in lymphocytes as compared to the myeloid and erythroid lineages (**Fig. 1c**,  
84 Wilcoxon test,  $p < 2.2e^{-16}$ ). As anticipated, most somatic mtDNA mutations were  
85 detected at low VAF in individual cells in all cell types (**Fig. 1d**). However, the  
86 distribution of homoplasmic mutations (i.e., those at VAF~1) varies substantially among  
87 the different cell types. For instance, progenitor cells, including HSCs, MPPs, LMPPs,  
88 CLPs, CMPs, and GMPs, exhibit the typical monotonic decline in the number of  
89 mutations with increasing VAF (**Fig. 1d**). While this pattern was also true in both the  
90 myeloid and erythroid lineages (e.g., monocytes and erythrocytes), we observed an  
91 unanticipated increase in the number of homoplasmic mutations in B, T and NK cells  
92 (**Fig. 1d**).

93

94 In addition to the mtscATAC-seq dataset from PBMCs, we analyzed another  
95 mtscATACseq dataset of 10,327 bone marrow mononuclear cells (BMMCs) from an  
96 independent healthy donor<sup>18</sup> (**Fig. 2a**). As the observations in PBMCs, lymphocytes in  
97 BMMCs also carried a lower mtDNA mutational burden with a characteristic  
98 overrepresentation of homoplasmic mutations (**Fig. 2b and Extended Data Fig. 1c**). In  
99 fact, these lymphocyte-specific characteristics were also verified by additional scATAC-

100 seq or scRNA-seq data from 7 independent individuals (**Extended Data Fig. 2**),  
101 indicating a general and unique process of clonal dynamics of mtDNA in lymphocyte  
102 development.

103

### 104 **Asynchronous replication of mitochondrial and nuclear genome during B cell** 105 **development**

106 To examine whether the distinct VAF distribution between lymphoid cells and  
107 myeloid/erythroid cells is due to the variation of mtDNA copy number per cell, we  
108 estimated the relative number of mtDNA copies in each cell type according to the  
109 fraction of sequencing reads mapped to the mitochondrial genome relative to the total  
110 number of reads in each cell (**Fig. 3a and Extended Data Fig. 3a**). Although mature  
111 lymphocytes and progenitor cells had similar mtDNA copy numbers, pro-B and pre-B  
112 cells—the earliest lineage-committed cells in B cell development—exhibited a  
113 significantly lower number of mtDNA copies (Wilcoxon test, pro-B/pre-B versus  
114 HSC/MPP,  $p < 2.2e^{-16}$ ; pro-B/pre-B versus B,  $p < 2.2e^{-16}$ ). Of note, the CLPs also showed  
115 significantly fewer mtDNA copies than earlier progenitors (Wilcoxon test, CLP versus  
116 HSC/MPP,  $p < 2.2e^{-16}$ ; CLP versus LMPP,  $p < 2.2e^{-16}$ ), thus indicating a remarkable  
117 mtDNA copy number reduction in early lymphocyte development. Therefore, we  
118 hypothesized that the characteristic mutational spectra in lymphocyte mtDNA (**Fig. 1c-**  
119 **d and Fig. 2b**) might result from a mitochondrial genetic bottleneck.

120

121 To address this possibility, we examined the mtDNA replication machinery to gain  
122 insight into the regulation of mtDNA copy number along the lymphocyte differentiation  
123 trajectory. Since T cells matures in thymus and their progenitor, pre-T cells, are not  
124 available in by PBMCs, we focused on the B cell lineage. DNA polymerase  $\gamma$  is the only  
125 known mitochondrial DNA polymerase in animals<sup>19</sup>. DNA polymerase  $\gamma$  has both a  
126 catalytic (*POLG*) and a binding subunit (*POLG2*) and can catalyze the polymerization  
127 of deoxyribonucleotides. High levels of DNA polymerase  $\gamma$  activity have been detected  
128 in cell cycle phases S and G2 to maintain stable numbers of mtDNA during cell  
129 division<sup>19-21</sup>. To determine whether the expression of DNA polymerase  $\gamma$  increases with  
130 cell proliferation during B cell development, we projected the developmental trajectory  
131 of cell subpopulations from HSCs to mature B cells via a pseudo-time analysis with  
132 scRNA-seq data (**Fig. 3b and Extended Data Fig. 3b**). We observed up-regulation of

133 G1/S phase-specific genes (such as DNA polymerase  $\delta$ , *POLD1–3*) in both pro-B and  
134 pre-B cell populations, thus suggesting high activation of cell proliferation in these cell  
135 types (**Fig. 3c-d and Extended Data Fig. 3c-e**). In contrast, the expression of DNA  
136 polymerase  $\gamma$  was not coupled with cell proliferation (**Fig. 3e-f and Extended Data Fig.**  
137 **3c-e**). Unexpectedly, the expression of the DNA polymerase  $\gamma$  binding subunit (*POLG2*)  
138 was significantly diminished in the highly proliferative pro-B and pre-B cell  
139 subpopulations (**Fig. 3g**). Together, these results imply a genetic bottleneck during B  
140 cell development which might have resulted from limited replication of mtDNA, thus  
141 diluting the mtDNA copy number throughout cell division.

142

### 143 **Quantification of mtDNA genetic bottleneck by computational modeling**

144 To test our hypothesis and quantify the extent of the mitochondrial genetic bottleneck,  
145 we developed a computational model of an mtDNA dilution process based on  
146 population genetics theory (**Fig. 4a**). In this model, we assumed that only a proportion  
147 of mtDNA molecules (denoted by  $\alpha$ ) replicates during each cell cycle. This process  
148 continues for  $T_d$  cell cycles until the mtDNA copy number recovers to the initial levels  
149 ( $\sim 500$  copies per cell estimated by Ryan et.al<sup>22</sup>). Using the approximate Bayesian  
150 computation (ABC) method, we estimated the model parameters for B, T and NK cell  
151 populations by using a constant mtDNA mutation rate of  $10^{-7}$  per site per cell division<sup>23</sup>  
152 (**Fig. 4b and Extended Data Fig. 4a**). The model estimations showed the minimal  
153 mtDNA copy number were 21 (95% confidence interval [CI] =13–56), 13 (95% CI=12–  
154 19) and 14 (95% CI=12–21) in each B, T and NK cell, respectively. These values were  
155 20–40-fold lower than the normal mtDNA levels. The VAF distribution simulated with  
156 these parameter estimations recapitulated the observed data, showing a characteristic  
157 overrepresentation of homoplasmic mutations (i.e., VAF $\sim 1$ ) and a reduced overall  
158 mutational burden (**Fig. 4c and Extended Data Fig. 4b-c**). Notably, this pattern cannot  
159 be achieved by random genetic drift alone with a constant number of mtDNA copies.

160

### 161 **The consequence of mtDNA genetic bottleneck**

162 Collectively, our integrative genomic data analysis and computational modeling  
163 demonstrated the existence of a stringent mtDNA genetic bottleneck that resulted from  
164 replicative dilution during lymphocyte development. This mechanism strengthens the  
165 genetic drift toward a lower mtDNA mutational burden and lower genetic diversity within

166 each cell. We wondered whether the genetic bottleneck during lymphocyte  
167 development might have the same purifying selection effects as those in the germline.  
168 We thus examined the VAF distribution in various genomic regions (loop, tRNA, rRNA  
169 and coding) or mutation types (synonymous and nonsynonymous), as well as the  
170  $dN/dS$  ratio (the ratio of the normalized number of nonsynonymous substitutions -  $dN$   
171 to the normalized number of synonymous substitutions -  $dS$ ) (**Extended Data Fig. 5a**  
172 and **Extended Data Fig. 6a**). We observed no significant differences in the VAF  
173 distribution for mutations in different genomic regions or substitution types among the  
174 various cell types. Moreover, the calculated  $dN/dS$  ratios revealed a pattern of  
175 generally neutral evolution (i.e.,  $dN/dS \sim 1$ ) in all categories in most of the cases  
176 examined (**Extended Data Fig. 5b** and **Extended Data Fig. 6b**).

177

178 Thus, our results showed that the entire mtDNA genome was evolving under a  
179 neutrality-like process. However, this is likely due to linkage of whole mitochondrial  
180 genome with strong Hill–Robertson interference, leading to a pattern of quasi-neutrality  
181 as in cancer evolution<sup>24</sup>. Therefore, we checked individual mutation sites to look for the  
182 signals of purifying selection and indeed observed several mutations that were  
183 specifically eliminated in lymphocytes compared to myeloid lineage (**Fig. 5a-b**). For  
184 example, the mutations, 2636G/A and 3209A/G, underwent the most profound  
185 decrease in prevalence (**Fig. 5c**) in lymphocytes. Intriguingly, these two sites are all  
186 located at MT-RNR2, which encode 16S rRNA and Humanin, a peptide playing  
187 protection roles in multiple mitochondrial diseases (**Fig. 5d**)<sup>25</sup>. Furthermore, we queried  
188 MITOMAP, a human mitochondrial genome database, and found that mtDNA variants  
189 reported on MT-RNR2 were highly associated with sepsis ( $p < 2.2e^{-16}$ , **Fig. 5e**)<sup>26,27</sup>,  
190 suggesting MT-RNR2 may play important roles in immune functions to protect from  
191 infections. These data indicate purifying selection in lymphocytes indeed occurs for  
192 specific mtDNA mutation sites.

193

## 194 **DISCUSSION**

195 Collectively, we observed an unanticipated lower mutational burden and accumulation  
196 of homoplasmic mtDNA mutations in lymphocytes that depicted a stringent genetic  
197 bottleneck and purifying selection of mtDNA. Gene expression data and computational  
198 modeling suggest a dilution process, based on the rate of mtDNA replication relative

199 to the nuclear genome. Although the single-cell data derived from PBMCs cannot  
200 capture the full developmental trajectory of T cells because pre-T cells develop in the  
201 thymus. Our single cell data and computational inference indicates the genetic  
202 bottleneck in T and NK cells might be as stringent as that in B cells (**Fig. 1d, Fig. 2a,**  
203 **Fig. 4b**). Further systematic study of T cell precursors in the thymus may provide further  
204 insight on how genetic bottleneck occurs during T cell development. Also, based on  
205 our observations and simulations, we hypothesize that the regulation of lymphocyte  
206 specific genetic bottleneck may start from CLP stage, instead of subsequent lineage  
207 commitment for B, T and NK cells. The effect of this regulation was likely enhanced via  
208 the active proliferation of progenitor cells. We knew that during lymphocyte  
209 development, multipotent T and B progenitor cells undergo a series of maturation steps  
210 that include positive selection for functional T-cell receptors (TCRs) or  
211 immunoglobulins and negative selection to eliminate cells with a high affinity for self-  
212 associated peptides or antigens<sup>28</sup>. Only a small proportion of T lymphoid cells will  
213 survive from the negative and positive selections. Moreover, mitochondrial function is  
214 important for T cell development and their functional activation<sup>29,30</sup>. The metabolic  
215 responses characteristic of lymphocytes development and activation are both well-  
216 regulated at transcriptional and post-transcriptional levels<sup>31</sup>. For example, several  
217 groups have shown that T or B cell activation leads to mitochondrial remodeling and  
218 dramatic shifts in cell metabolism, as part of their role in eliminating pathogens<sup>32-36</sup>.  
219 Meanwhile the selection against pathogenic mutations 3243 was stronger in T cells  
220 than B and NK as shown by Walker et.al<sup>16</sup>. All these evidences suggested that the  
221 mtDNA genetic bottleneck may be one of several potential mechanisms in the  
222 regulation of mitochondrial genome in different lineages.

223  
224 Our novel discovery of a somatic mtDNA bottleneck specifically within the lymphoid  
225 lineage may play a role in the quality control of mitochondrial genomes, in parallel to  
226 the selection of immunoreceptor genes in the nuclear genome. Thus, a robust  
227 population of mtDNA may be crucial for lymphocyte-mediated immune responses.  
228 These findings provide new insight into immune degeneration and related diseases.  
229 The causing and the consequence of the somatic mtDNA genetic bottleneck require  
230 extensive efforts to explore.

231  
232



233 **CODE AVAILABILITY**

234 Code used for single cell data analysis and computational modeling are available at  
235 <https://github.com/tangzhi/Bottleneck>

236

237 **ACKNOWLEDGEMENTS**

238 We thank Weiwei Zhai (Institute of Zoology, Chinese Academy of Sciences) for  
239 constructive comments and suggestions on the manuscript. This work was supported  
240 by National Natural Science Foundation of China (32070644) to J.X., Guangdong  
241 Basic and Applied Basic Research Foundation (2019A1515110387,  
242 2019A1515110387) to J.X., the Natural Science Foundation of Guangdong  
243 (2021B1515020042) to Z.H., NIH grants RM1-HG007735 to H.Y.C. and China  
244 Postdoctoral Science Foundation (E12503) to Z.L. H.Y.C. is an Investigator of the  
245 Howard Hughes Medical Institute.

246

247 **AUTHOR CONTRIBUTIONS**

248 J. X., Z.H and H.Y.C. designed and conceived the study. Z.T., B.C. and W.Z. collected  
249 and analyzed the data. Z.H. and Z.L. designed the dilution model and performed the  
250 simulations. J. X., Z.H., Z. T. and Z.L. wrote the manuscript with inputs from all  
251 authors. All authors read and approved the final manuscript.

252

253 **COMPETING INTERESTS**

254 H.Y.C. is a co-founder of Accent Therapeutics, Boundless Bio, Cartography  
255 Biosciences, and is an advisor to 10x Genomics, Arsenal Biosciences, and Spring  
256 Discovery. The other authors declare no conflict of interest.

257

258 **ONLINE METHODS**

259 **Data collection**

260 The mtscATAC-seq dataset generated through evaluation of hematopoietic and  
261 PBMCs was retrieved from a recent study evaluating samples from a healthy 47-year-  
262 old donor<sup>17</sup>. The mtscATAC-seq dataset from human bone marrow from 25-year-old  
263 healthy donor was obtained from Mimitou et.al<sup>18</sup>. The scATAC-seq data from CD4<sup>+</sup> T  
264 cells were obtained from the study published by Satpathy et al.<sup>37</sup>. The scATAC-seq  
265 dataset for hematopoietic stem cells (HSCs), multi-potent progenitors (MPPs),

266 lymphoid-primed multipotent progenitors (LMPPs), common lymphoid progenitors  
267 (CLPs), common myeloid progenitors (CMPs), granulocyte-macrophage progenitors  
268 (GMPs) and plasmacytoid dendritic cells (pDCs) derived from CD34<sup>+</sup> bone marrow was  
269 obtained from Buenrostro et al.<sup>38</sup> (**Extended Data Fig. 2**). The scRNA-seq dataset  
270 generated from an evaluation of healthy CD34<sup>+</sup> PBMCs, bone marrow mononuclear  
271 cells (BMMCs) and total PBMCs was downloaded from the study published by Granja  
272 et al.<sup>39</sup> These datasets were used to analyze mtDNA replication and gene transcription  
273 (**Methods**). The scRNA-seq dataset of 70 effector memory T cells (Tem cells), 70  
274 central memory T cells (Tcm cells) and 142 CD4<sup>+</sup> regulatory T cells (Treg cells) from  
275 healthy human colon tissue were downloaded from Array Express (E-MTAB-6072)<sup>40</sup>.  
276 Detailed information on data resources is provided in **Supplementary Table 1**.

277

## 278 **Single-cell (sc)ATAC-seq data pre-processing and annotation of the cell** 279 **populations**

280 Raw data from GSE142745 were processed with Cell Ranger ATAC (version 2.0.3; 10x  
281 Genomics, <https://www.10xgenomics.com/products/single-cell-atac>) with default  
282 parameters. Reads were aligned to the reference hg19 human genome  
283 (<https://support.10xgenomics.com/single-cell-atac/software/downloads/latest>). In each  
284 cell, 40% of fragments overlapping a compendium of DNase hypersensitivity peaks  
285 and 1,000 unique nuclear fragments were filtered. From the output of the Cell Ranger  
286 Software calls, we performed a computational annotation of the cell types on the basis  
287 of chromatin accessibility. Clustering and gene activity scores were determined  
288 through standard processing via ArchR<sup>41</sup>. Clustering was performed with the  
289 "addClusters" and "addUMAP" functions (resolution=0.8, neighbors=10, minDist=0.1).  
290 To identify marker genes according to gene scores, we used the "getMarkerFeatures"  
291 function with useMatrix "GeneScoreMatrix" and generated a reproducible peak set in  
292 ArchR by using the "addReproduciblePeakSet" function. By default, ArchR attempts to  
293 identify peaks by using the MACS2 algorithm<sup>42</sup>. Because common cell markers are  
294 sometimes not suitable for classification with "GeneScoreMatrix", we used enhancer  
295 accessibility to define the cell type. For example, we identified myeloid cells according  
296 to the unique accessibility of enhancers at +85 kb and +87 kb in the interferon  
297 regulatory factor (*IRF8*) locus. Plasmacytoid dendritic cells (pDCs) were identified on  
298 the basis of the unique accessibility of +54 kb and +56 kb enhancers, as described by  
299 Satpathy et al.<sup>37</sup>. Furthermore, to label scATAC-seq clusters with scRNA-seq

300 information, we used the "addGeneIntegrationMatrix" function, which integrates  
301 scATAC-seq with scRNA-seq. Specific marker genes used to identify individual cell  
302 types in scATAC-seq datasets of healthy CD34<sup>+</sup> hematopoietic cells and PBMCs are  
303 documented in **Supplementary Table 2**.

304

### 305 **Mitochondrial DNA variants identified in single-cell ATAC-seq datasets**

306 Paired-end raw reads from each sample were aligned to the human reference genome  
307 (hg19) with Cell Ranger ATAC after adapter sequences were trimmed. First, the reads  
308 mapped to multiple sites or the nuclear genome, and duplicates were also removed.  
309 The remaining reads were realigned to correct the potential mapping errors around  
310 indels according to the process from GATK<sup>43</sup>. Bam files for each cell type were merged  
311 to identified germline mtDNA variants (bulk VAF >90%). Variants with VAF >90%  
312 shared among more than 90% cells were also considered germline mutations. Then  
313 mtDNA variants were called for each individual cell with VarScan2<sup>44</sup> with "--min-var-  
314 freq 0.01" and "--min-reads2 2". To identify high confidence somatic variants in single  
315 cell, the following filter steps were applied.

316

317 First, the germline mutations identified in the merged bam file were removed.

318 Second, the following sites were explicitly removed because of the large numbers of  
319 homopolymers in the revised Cambridge Reference Sequence (rCRS) and sequencing  
320 errors in the reference genome<sup>13</sup>:

321 Misalignment due to ACCCCCCTCCCCC (rCRS 302–315), including  
322 302A/C, 309C/T, 311C/T, 312C/T, 313C/T and 316G/C;

323 Misalignment due to GCACACACACACC (rCRS 513–525), including  
324 514C/A, 515A/G, 523A/C and 524C/G;

325 Misalignment due to 3107N in ACNTT (rCRS 3105–3109), including  
326 3106C/A, 3109T/C and 3110C/A.

327 Third, sequencing errors can significantly affect the identification of somatic variants.  
328 Therefore, sequencing errors known to be associated with a high error rate according  
329 to Illumina NextSeq and sequence errors (G→T and C→A) from DNA damage were  
330 removed.

331 Fourth, strand balance was required for confident somatic variants. For the given  
332 variant site, we required the reads mapped to the forward strand to be above 30% but  
333 below 70% of the total mapped reads for the variant allele.

334 Variants that passed the multiple filter steps were merged from all individual cells as  
335 the final somatic variants. If the variant was sufficiently confident in any given cell, the  
336 variant allele frequency was re-counted in all individual cells within the same cell type,  
337 without any other constraints.

338

### 339 **Single-cell RNA-seq data processing and cell-type annotation**

340 Downstream analysis of scRNA-seq dataset was performed with Seurat<sup>45</sup> (version  
341 3.2.2; <https://satijalab.org/seurat>). The following bioinformatic analyses were  
342 performed in R software (version 3.6.0; <https://www.r-project.org>) with default settings  
343 unless otherwise stated. Cells with <200 or >2,500 detected genes or with >5%  
344 mitochondrial DNA were eliminated from further consideration. Normalization was  
345 applied with the MAGIC package (version 2.0.3)<sup>46</sup> by following the Seurat v3 workflow.  
346 We next calculated a subset of features that exhibited high cell-to-cell variability by  
347 using the "FindVariableFeatures" function and identified 2,000 specific features.  
348 Clusters were identified with the "Find-Neighbors" and "FindClusters" functions in  
349 Seurat with 45 principal components (PCs) and a resolution of 0.3. The results were  
350 annotated to include differential expression of cell type-specific marker genes. Uniform  
351 Manifold Approximation and Projection for Dimension Reduction (UMAP)  
352 dimensionality reduction was performed with the "RunUMAP" function in Seurat, with  
353 45 PCs and other default parameters. The expression of cell type-specific marker  
354 genes in PBMCs and BMDCs is shown in **Supplementary Table 3**. We referred to the  
355 information and classifications recorded in GSE139369 from the GEO Database to  
356 guide our cell type annotations (**Supplementary Table 3**).

357

### 358 **Pseudo-time analysis**

359 To construct single-cell differentiation trajectories with scRNA-seq data from HSCs to  
360 B cells, we performed a pseudo-time analysis with the Monocle method<sup>47-49</sup>. First, we  
361 subdivided scRNA-seq data according to the annotated cell populations revealed by  
362 Seurat clustering analysis, according to the common pipeline (<http://cole-trapnell-lab.github.io/monocle-release/monocle3/>). Re-clustering of selected cell populations  
363 was again performed with the "RunUMAP" function. Pseudo-time analysis was  
364

365 conducted on these newly generated clusters with Monocle v3. We delineated  
366 expression patterns of G1/S phase-specific and mtDNA replication-related genes along  
367 a pseudo-timeline. G1/S phase-specific genes were identified according to a previously  
368 annotated list<sup>50</sup> (**Extended Data Fig. 3d**).

369

### 370 **Mitochondrial DNA variants identified from single-cell RNA-seq data**

371 Mitochondrial DNA variants from single-cell RNA-seq data were processed in the same  
372 manner as mtDNA variants from scATAC-seq, with several modifications. Briefly, we  
373 used STAR<sup>51</sup> to align reads to the human reference genome (hg19) and to obtain bam  
374 files. Germline mutations and mtDNA variants in individual cells were filtered and called  
375 in the same manner.

376

### 377 **Allele frequency spectrum**

378 The allele frequency (heteroplasmic ratio) of each mutation were calculated in each  
379 cell and the number of mutations fall in each frequency bin (from 0~1) were counted  
380 for each cell types. Somatic mutations arose in the early development stage, which  
381 had been fixed in the progenitor cells, were further excluded for the ASF analysis in  
382 the mtscATAC-seq from BMDCs.

383

### 384 **Annotation of mitochondria DNA mutations and calculation of non- 385 synonymous/synonymous mutation rates (dN/dS)**

386 The mitochondrial variants were annotated with ANNOVAR<sup>52</sup>. The annotated variants  
387 comprised mutations in loops, tRNA, rRNA and mRNA coding regions, including non-  
388 synonymous (NS) and synonymous (SY) substitutions according to the variant location  
389 (**Extended Data Fig. 5a** and **Extended Data Fig. 6a**). Coding sequences (CDS) within  
390 the mitochondrial genome were evaluated with Phylogenetic Analysis of Maximum  
391 Likelihood (PAML) to identify all possible synonymous (defined as S) and  
392 nonsynonymous (defined as N) substitutions in the human mitochondrial genome<sup>53</sup>.  
393 On the basis of ANNOVAR's annotations, we identified all observed synonymous  
394 (defined as s) and nonsynonymous substitutions (defined as n). The non-synonymous  
395 mutation rate (dN)=n/N and the synonymous mutation rate (dS)=s/S, responses to

396 positive, neutral, or negative selection pressure, can be determined by the dN/dS ratio.

397

### 398 **Computational modeling of the mitochondrial genetic bottleneck**

399 We used the Wright-Fisher model from population genetics to depict the accumulation  
400 of mutations and the dynamic frequency of heteroplasmic alleles in mtDNA during  
401 lymphoid cell divisions. The Wright-Fisher model assumes discrete generations and  
402 random sampling of individuals from the current generation without replacement by  
403 reproduction in the following generation. This model has been widely used to model  
404 the mtDNA population dynamics in both germline cells and somatic cells, including  
405 those that are neoplastic<sup>23,54</sup>. Because normal somatic cells typically contain 100–  
406 1,000 copies of mtDNA, we used  $n=500$  as the baseline copy number in our model<sup>22</sup>.  
407 Results from the scATAC dataset revealed that the relative copy number of mtDNA in  
408 NK cells was approximately 60% that detected in B or T cells (**Fig. 3a**); thus, 300  
409 ( $500 \times 0.6$ ) was used as the baseline mtDNA copy number for the NK lymphocyte cohort.  
410 We modeled the lymphoid development from lymphoid-primed multipotent progenitor  
411 (LMPP) cells, which are the common progenitor cells for all lymphocytes, B, T and NK  
412 cells. To model the dilution-based genetic bottleneck, we introduced a dilution rate  $\alpha$ ,  
413 which denotes the fraction of mtDNA molecules in each cell that undergo replication  
414 within a single cell cycle, and  $T_d$ , which denotes the time of the diluting process. After  
415  $T_d$  cell divisions from LMPP, the mtDNA copy number in each cell type rapidly recovers  
416 to the baseline level. The minimal mtDNA copy number through the bottleneck can be  
417 computed by:

$$418 \quad N_b = N_0 \alpha^{T_d} \quad \text{Eq (1)}$$

419 where  $N_0$  is the initial number of mtDNA copies. The total number of cell divisions  
420 required for the transition from an LMPP to a mature lymphocyte is denoted  $T_a$ . The  
421 mutation rate at each site within the mitochondrial genome per cell division is denoted  
422  $\mu$ , which has been estimated to be  $10^{-8}$ – $10^{-7}$  mutations per site for somatic cells<sup>23,55</sup>.  
423 Thus, the mutation rate for the entire mitochondrial genome during each cell division  
424 event will be  $u = \mu \times L$ , where  $L=16,569$  base pairs (bp), representing the number of  
425 potential sites within the mitochondrial DNA length.

426

427 During each cell division, the number of somatic mutations acquired per mitochondrial  
428 genome follows a Poisson distribution with a mean of  $u$ . Thus, the probability that  $k$   
429 mutations occurred in each cell division is as follows:

430 
$$P(x = k) = \frac{u^k e^{-u}}{k!} \quad \text{Eq (2)}$$

431

## 432 **Computational inference of parameters by approximate Bayesian computation**

433 We used the framework of approximate Bayesian computation (ABC) for parameter  
434 inference in our computational model of somatic mtDNA population dynamics on the  
435 basis of the dilution rate  $\alpha$ , the dilution time course  $T_d$  and the total number of cell  
436 divisions  $T_a$ . The minimal mtDNA copy number in each cell can be computed as  
437 described by Eq (1) when values for  $\alpha$  and  $T_d$  are available. The prior uniform  
438 distributions used for sampling  $\alpha$ ,  $T_d$  and  $T_a$ , were  $\alpha \sim U(0,1)$ ,  $T_d \sim U(0,30)$  and  
439  $T_a \sim U(10,40)$ . To avoid extinction (i.e., minimal mtDNA copy number=0), only the  
440 sampled parameter values ensuring  $N_b (= N_0 \alpha^{T_d}) > 10$  were retained. We used a  
441 version of ABC based on the acceptance-rejection algorithm<sup>56</sup> to estimate posterior  
442 probability distributions for the parameters of interest (i.e.,  $\theta [\alpha, T_d, T_a]$ ). We used 19  
443 summary statistics ( $\mathbf{S}$ ), which included the mtDNA mutation count in each VAF bin as  
444 step=0.05 from VAF=0.05 to 1 to fit the simulated to the observed data. The ABC  
445 version of rejection sampling is as follows:

446 For  $i=1$  to  $K$  simulations:

- 447 1. Sample parameters  $\theta'$  from the prior distribution  $\pi(\theta)$
- 448 2. Simulate data ( $\mathbf{D}'$ ) with the sampled parameters ( $\theta'$ ) and summarize  $\mathbf{D}'$   
449 as summary statistics ( $\mathbf{S}'$ ).
- 450 3. Accept  $\theta'$  if  $d(\mathbf{S}', \mathbf{S}) < \epsilon$ , for a given tolerance rate  $\epsilon$ , where  $d(\mathbf{S}', \mathbf{S})$  is a  
451 measure of the Euclidean distance between  $\mathbf{S}'$  and  $\mathbf{S}$
- 452 4. Return to step 1.

453

454 With this scheme, we approximated the posterior distribution by  $P(\theta | d(\mathbf{S}', \mathbf{S}) < \epsilon)$ . We  
455 used a common variation in ABC<sup>57,58</sup> in which, rather than using a fixed threshold,  $\epsilon$ ,  
456 we sorted all calculated  $K$  distances by  $d(\mathbf{S}', \mathbf{S})$  (see step 3 above) and accepted the  
457  $\theta'$  that generated the smallest  $100 \times \eta$  percentage distances. We used  $K=10^6$  and  
458  $\eta=0.001$  so that the posterior distribution was composed of  $10^6 \times 0.001 = 1,000$  data  
459 points. We ran the ABC inference procedures for two mutation rates ( $\mu=10^{-8}$  and  $10^{-7}$ )

460 and performed model selection (**Extended Data Fig. 4**). The mutation rate  $\mu=10^{-7}$   
461 fitted the data better in all cell types and thus was used for the computational inference.  
462 The ABC procedure was performed with the R package *abc*<sup>59</sup>.



463 **Figures and Legends**

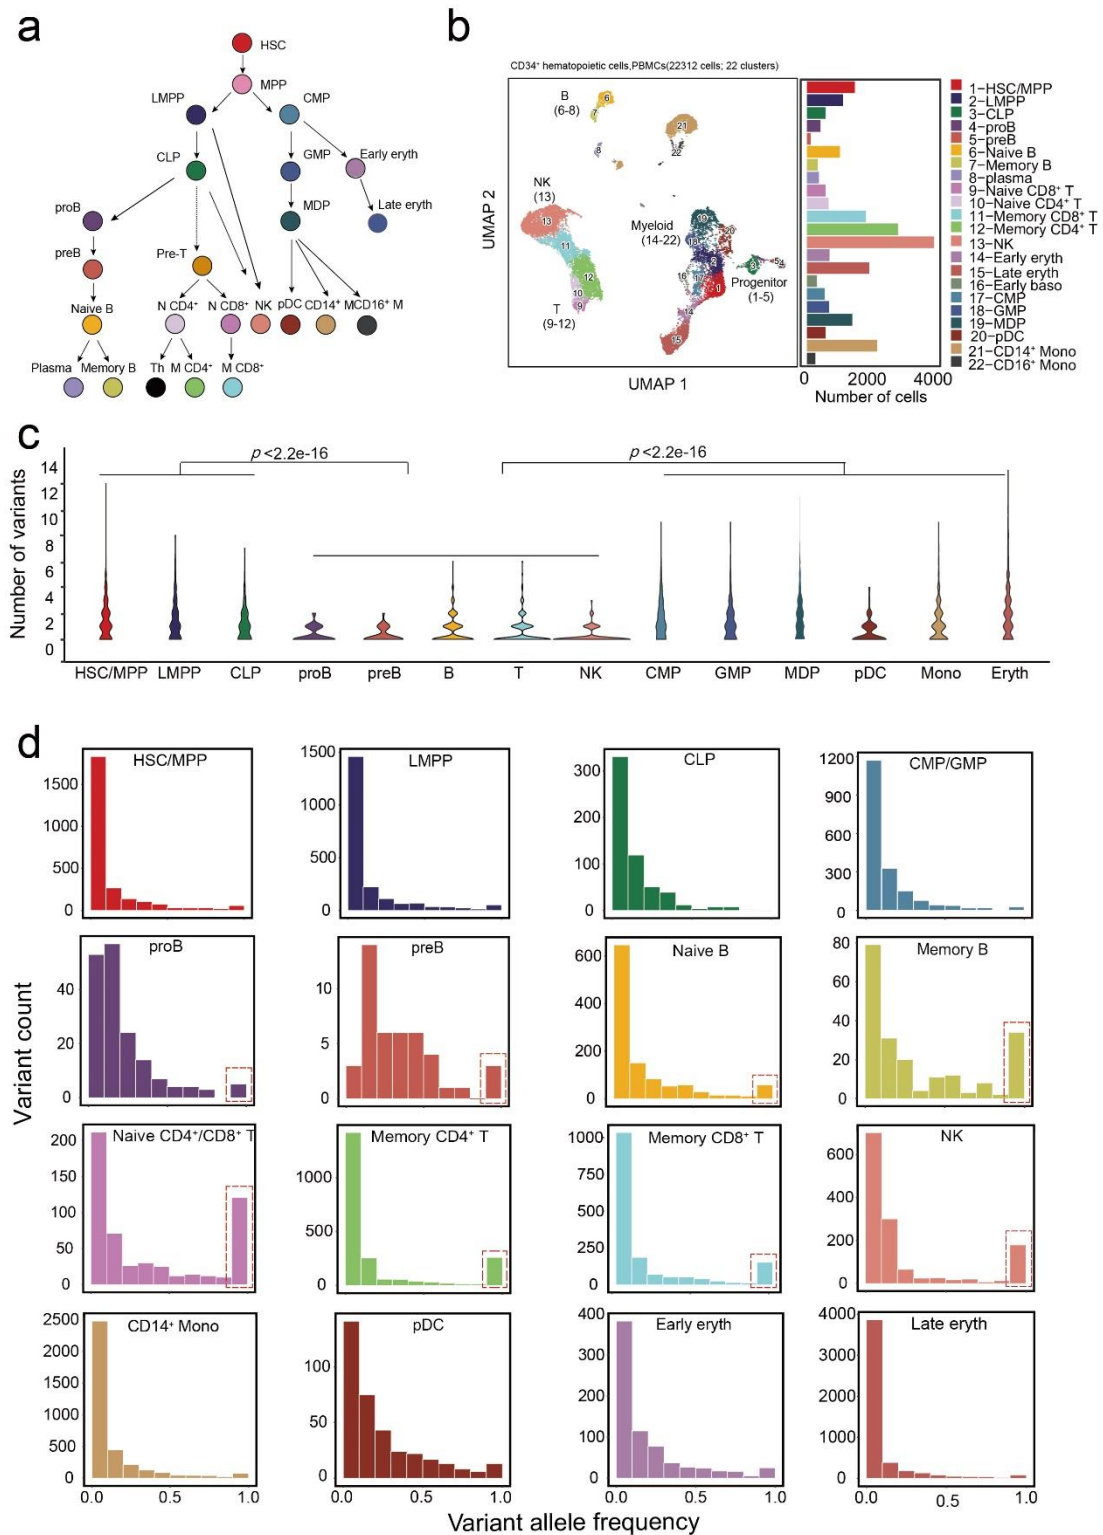

464

465 **Fig. 1 Somatic mutations in the mtDNA of PBMCs.**

466 (a) Schematic of human hematopoietic differentiation and lineage commitment. HSC,  
467 hematopoietic stem cell; MPP, multipotent progenitor; LMPP, lymphoid-primed

468 multipotent progenitor; CLP, common lymphoid progenitor; CMP, common myeloid  
469 progenitor; GMP, granulocyte-monocyte progenitor; MDP, monocyte-dendritic cell  
470 progenitor; N CD4, naïve CD4<sup>+</sup> T cell; N CD8, naïve CD8<sup>+</sup> T cell; M CD4, memory CD4<sup>+</sup>  
471 T cell; M CD8, memory CD8<sup>+</sup> T cell; Th, T helper cell; NK, natural killer cell; pDC,  
472 plasmacytoid dendritic cell; Eryth, erythrocyte.

473 **(b)** UMAP projection of 22,312 CD34<sup>+</sup> hematopoietic cells and PBMCs with  
474 mtscATAC-seq data. Dots represent individual cells that have been colored according  
475 to cluster identity. The bar plot indicates the number of cells in each cluster (labeled at  
476 right).

477 **(c)** Violin plot showing the number of somatic mtDNA variants per cell for various cell  
478 types; *P*-values, two-sided Wilcoxon rank-sum test.

479 **(d)** The VAF distribution of somatic mtDNA mutations across different cell types.  
480 Homoplasmic mutations (VAF ~1) identified in the lymphoid lineage are highlighted with  
481 a red box.

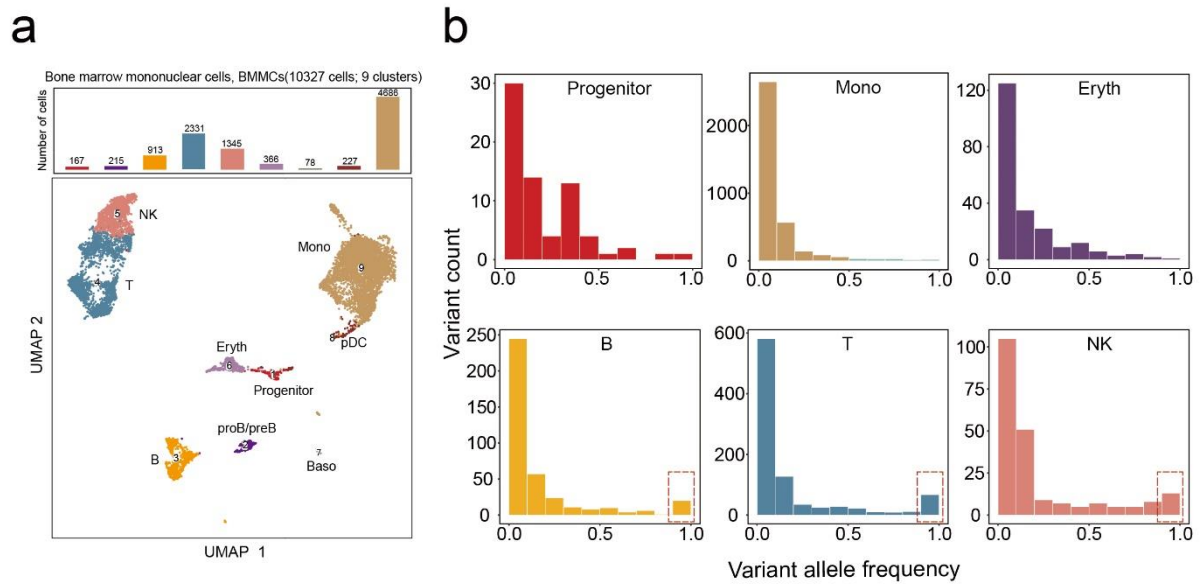

482

483 **Fig. 2 Somatic mutations in the mtDNA of BMMCs.**

484 **(a)** UMAP projection of 10,327 mononuclear cells from bone marrow with mtscATAC-  
485 seq data. Dots represent individual cells that have been colored according to cluster  
486 identify and cell types.

487 **(b)** The VAF distribution of somatic mtDNA mutations across different cell types in  
488 BMMCs. Homoplasmic mutations (VAF ~1) identified in the lymphoid lineage are  
489 highlighted with a red box.

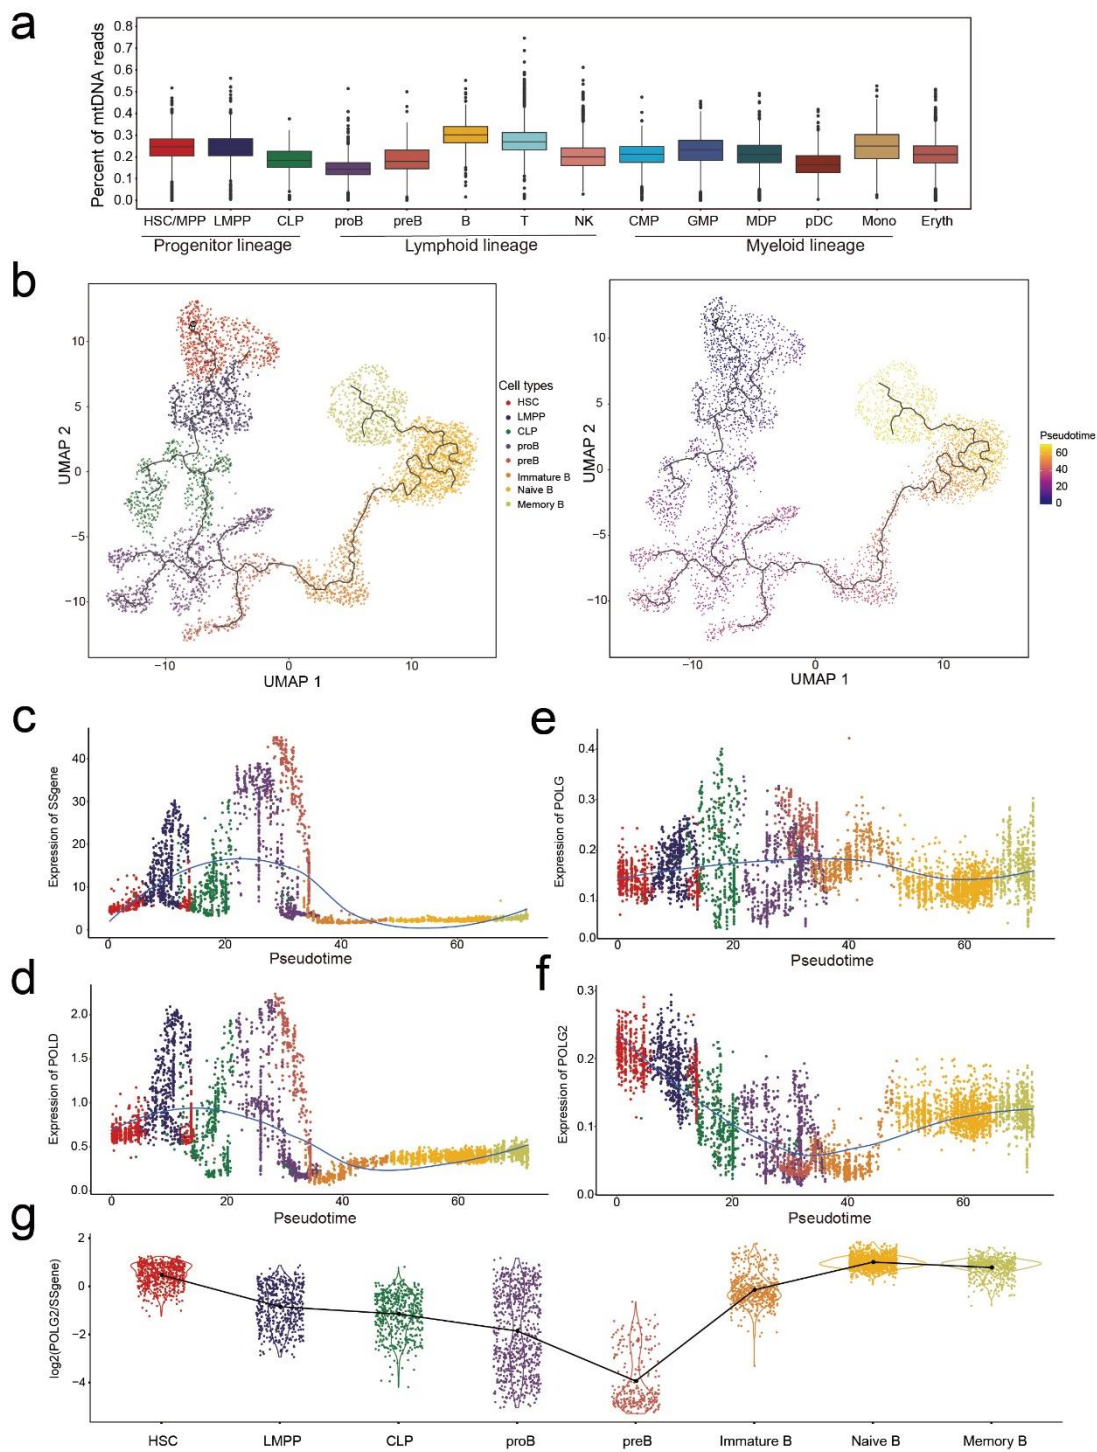

490

491 **Fig. 3 Replication of mtDNA during B cell development.**

492 (a) The relative number of mtDNA copies was determined by the proportion  
 493 (sequencing reads mapped to mitochondrial genome divided by the total number of  
 494 reads) in each cell, as identified from the scATAC-seq dataset.

495 (b) Pseudo-time trajectory of B cell differentiation from HSCs by using single-cell RNA-

496 seq data generated from PBMCs (n=4692 cells). Individual colors denote different cell  
497 types (top) and developmental stages (bottom) defined by pseudo-time. The solid line  
498 represents the fitted trajectory across pseudo-time.

499 **(c-f)** Kinetic plots showing the expression of **(c)** 39 G1/S phase-specific genes  
500 (SSgene), **(d)** nuclear DNA polymerase  $\delta$  (*POLD1-3*), **(e)** mtDNA polymerase  $\gamma$  (*POLG*)  
501 and **(f)** the binding subunit of mitochondrial DNA polymerase  $\gamma$  (*POLG2*) along the B-  
502 cell developmental trajectory.

503 **(g)** Violin plot showing the ratio of *POLG2* expression to the mean expression of all  
504 G1/S phase-specific genes in each cell associated with B-cell development. The  
505 broken line represents the change trend of the mean ratio across different cell types.

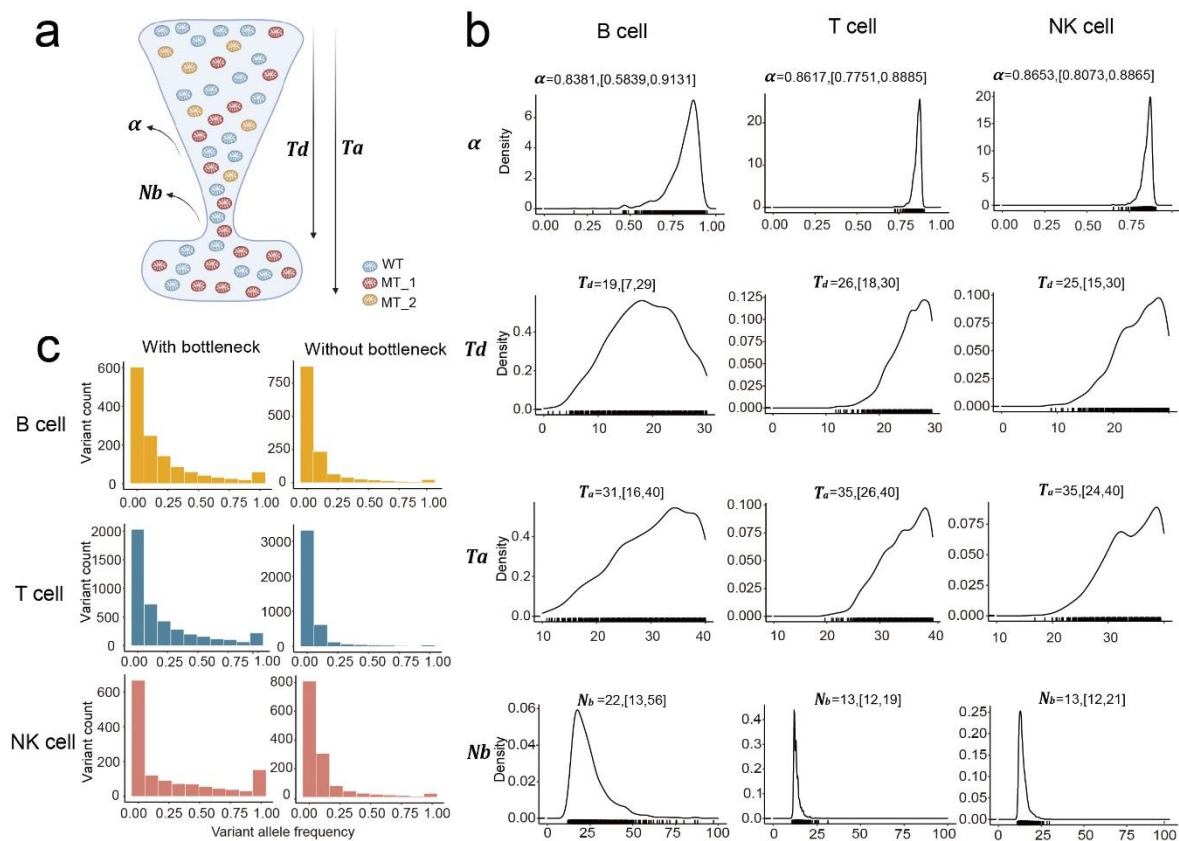

506

507 **Fig. 4 The dilution model of the mitochondrial genetic bottleneck.**

508 (a) Schematic illustration of the dilution model of the mitochondrial genetic bottleneck.  
 509 In this model, only a fraction of mtDNA molecules (denoted by  $\alpha$ ) replicate at each cell  
 510 division. After  $T_d$  cell divisions from the LMPP stage, the number of mtDNA copies in  
 511 each lymphocyte subtype (B, T, and NK cells) undergoes rapid recovery to the baseline  
 512 level ( $\sim 500$  per cell).  $N_b$  denotes the minimal number of mtDNA copies that can be  
 513 computed as Eq (1). The total number of cell divisions required for the transition from  
 514 LMPP to mature lymphocyte is denoted as  $T_a$ .

515 (b) The distribution of model parameters inferred by the Approximate Bayesian  
 516 Computation (ABC) algorithm. The mean and 95% confidence interval of each  
 517 parameter estimation is as shown.

518 (c) Simulations based on the dilution model of mitochondrial genetic bottleneck with  
 519 the ABC-estimated parameter values recapitulated the lymphocyte-specific  
 520 overrepresentation of homoplasic mutations and the lower mutation burden  
 521 (**Extended Data Fig. 3b**). The left and right panels represent the simulations with and

522 without mitochondrial genetic bottleneck, respectively. The average of 100 simulations  
523 carried out for each model is as shown. The results of each iteration are shown in  
524 **Extended Data Fig. 3c.**

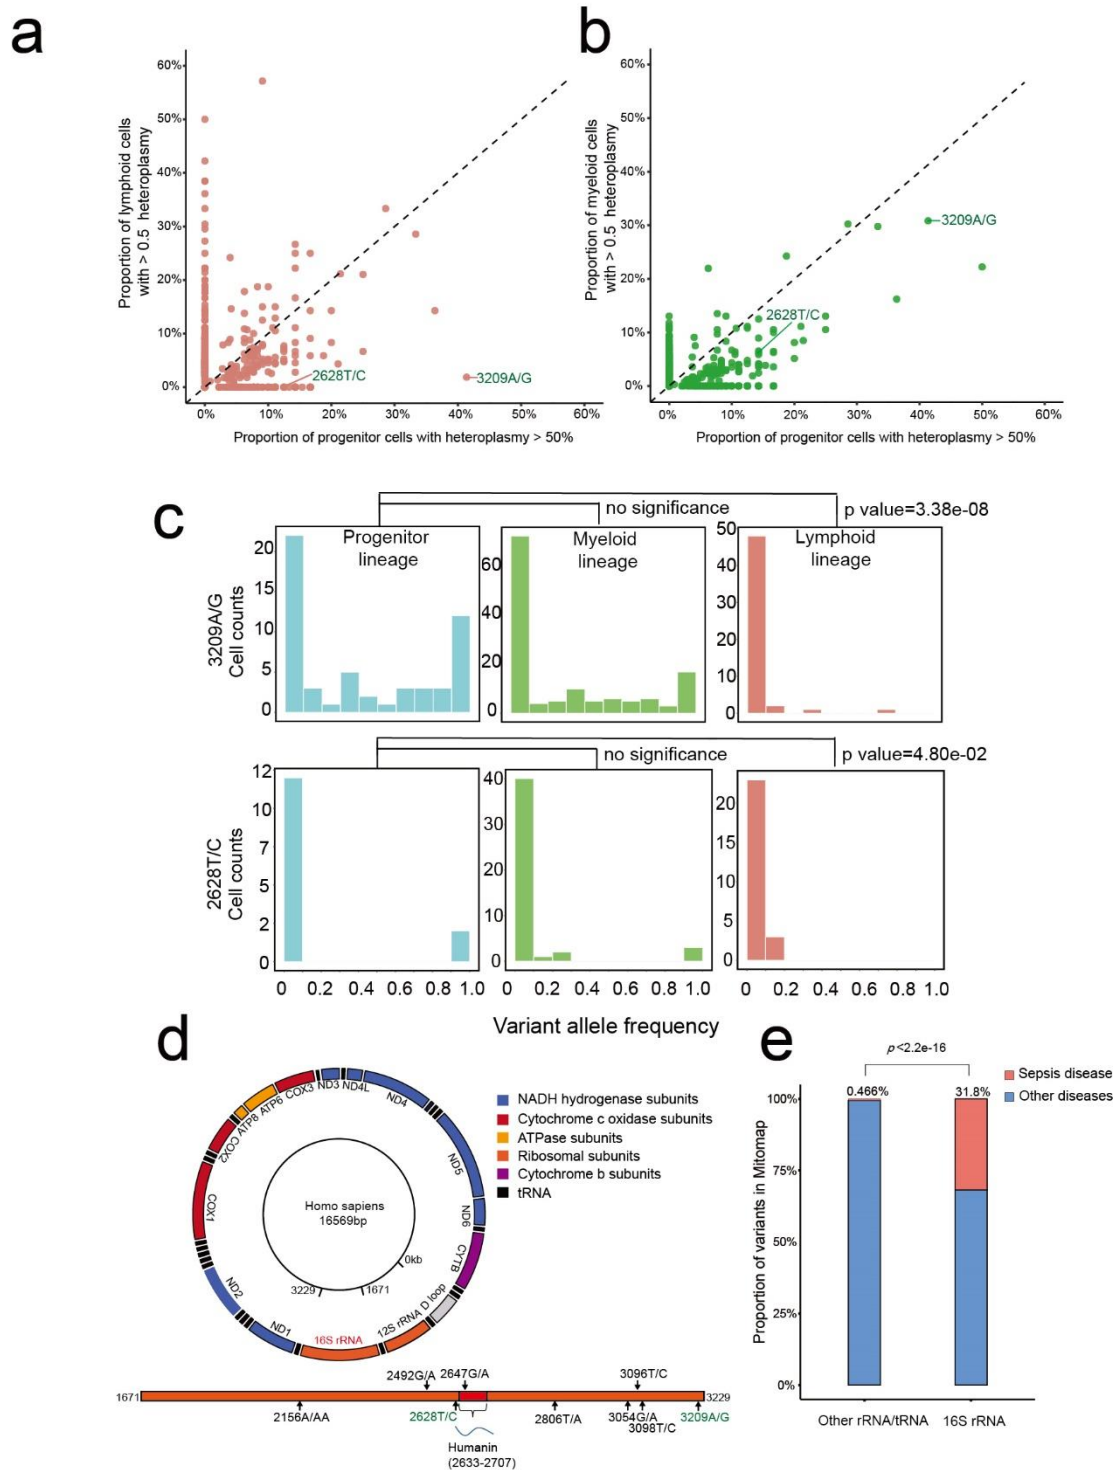

525

526 **Fig. 5 Elimination of specific mtDNA variants in lymphocyte.**

527 (a) Scatter plot documenting the percentage of cells with dominant mtDNA mutations

528 (VAF>50% in a single cell). Shown are the results from progenitor cells (HSC, MPP,

529 and LMPP) compared to cells from lymphoid (B, T, or NK cells) or myeloid lineages(b).



- 530 **(c)** The distribution of VAF for two individual sites (3209A/G, 2636G/A) in progenitor,  
531 myeloid and lymphoid cells, respectively. The  $p$  values shown were determined by the  
532 Chi-square test.
- 533 **(d)** The location of 16S RNA (MT-RNR2) on the mitochondrial genome and the location  
534 of sepsis association variants on MT-RNR2, reported in MITOMAP (in black), or  
535 specific eliminated in lymphocytes (in green).
- 536 **(e)** The proportion of mtDNA variants associated with sepsis disease in 16S RNA  
537 versus other rRNA/tRNA genes on mitochondrial genome.

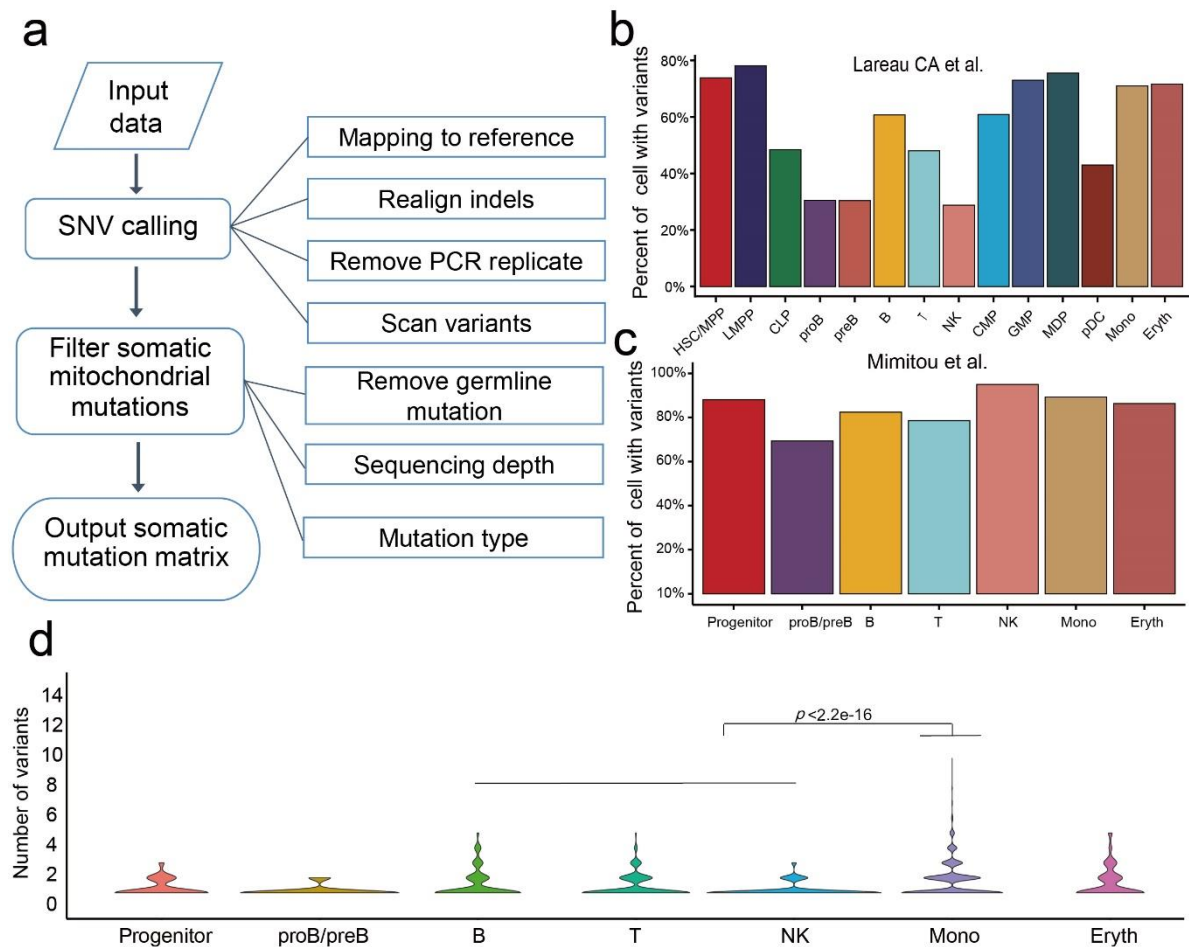

538

539 **Extended Data Fig. 1 Detection of somatic mitochondrial mutations in single**  
 540 **PBMCs with scATAC-seq data or scRNA-seq data.**

541 **(a)** Schematic of mtDNA mutation calling with scATAC-seq (including mtscATAC-seq)  
 542 or scRNA-seq data.

543 **(b)** Percentage of cells with at least one somatic mtDNA mutation detected in individual  
 544 cells for each cell type in the mtscATAC-seq data from Lareau et al.

545 **(c)** Percentage of cells with at least one somatic mtDNA mutation detected in individual  
 546 cells for each cell type in the mtscATAC-seq data from Mimitou et al.

547 **(d)** Violin plot showing the number of somatic mtDNA variants per cell for various cell  
 548 types;  $p$  values based on a two-sided Wilcoxon rank-sum test are as shown.

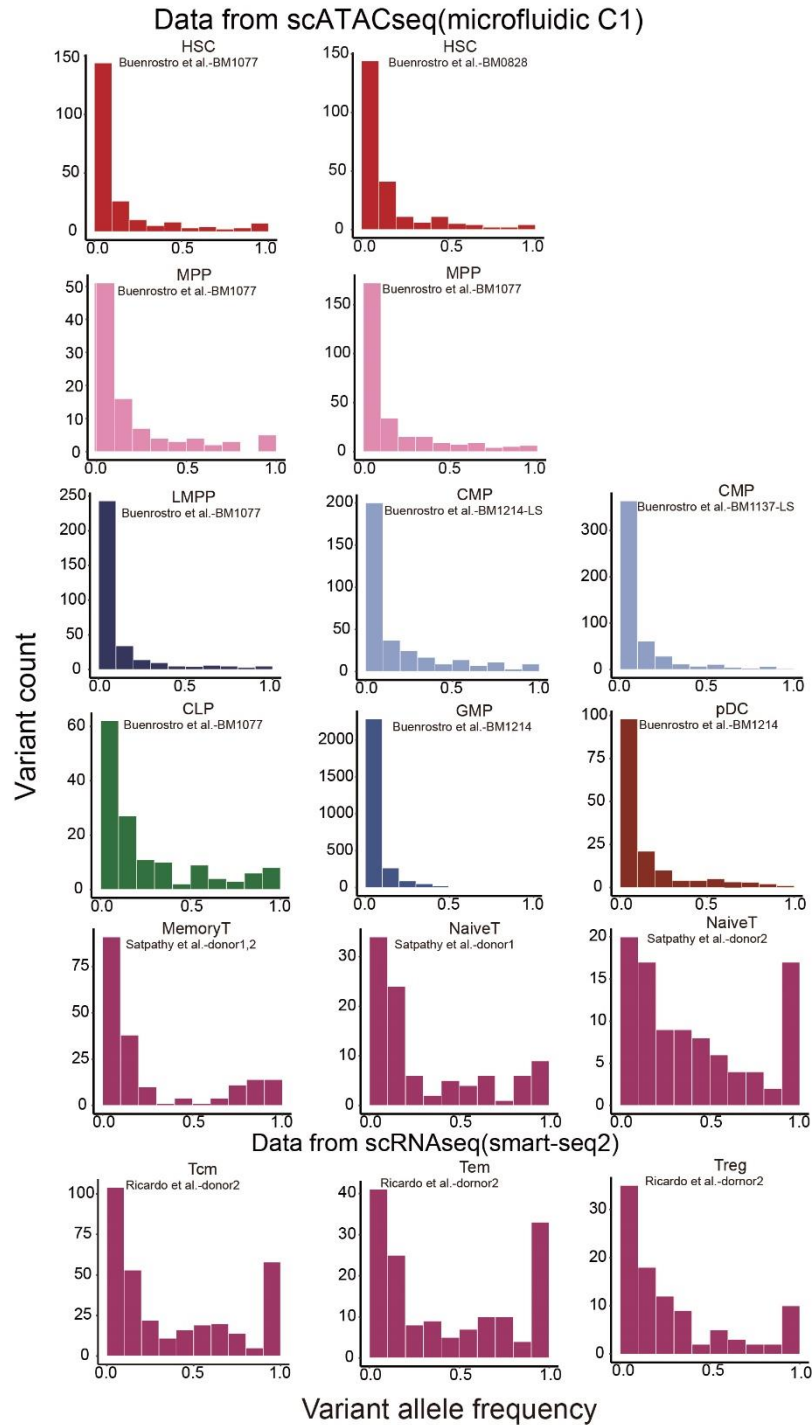

549

550 **Extended Data Fig. 2**

551 Allele frequency spectrum of somatic mtDNA mutations for different hematopoietic cell  
 552 types, on the basis of independent scATAC datasets (Buenrostro et al. and Satpathy  
 553 et al.) and an scRNA-seq dataset (Ricardo et al.).

554

555

556

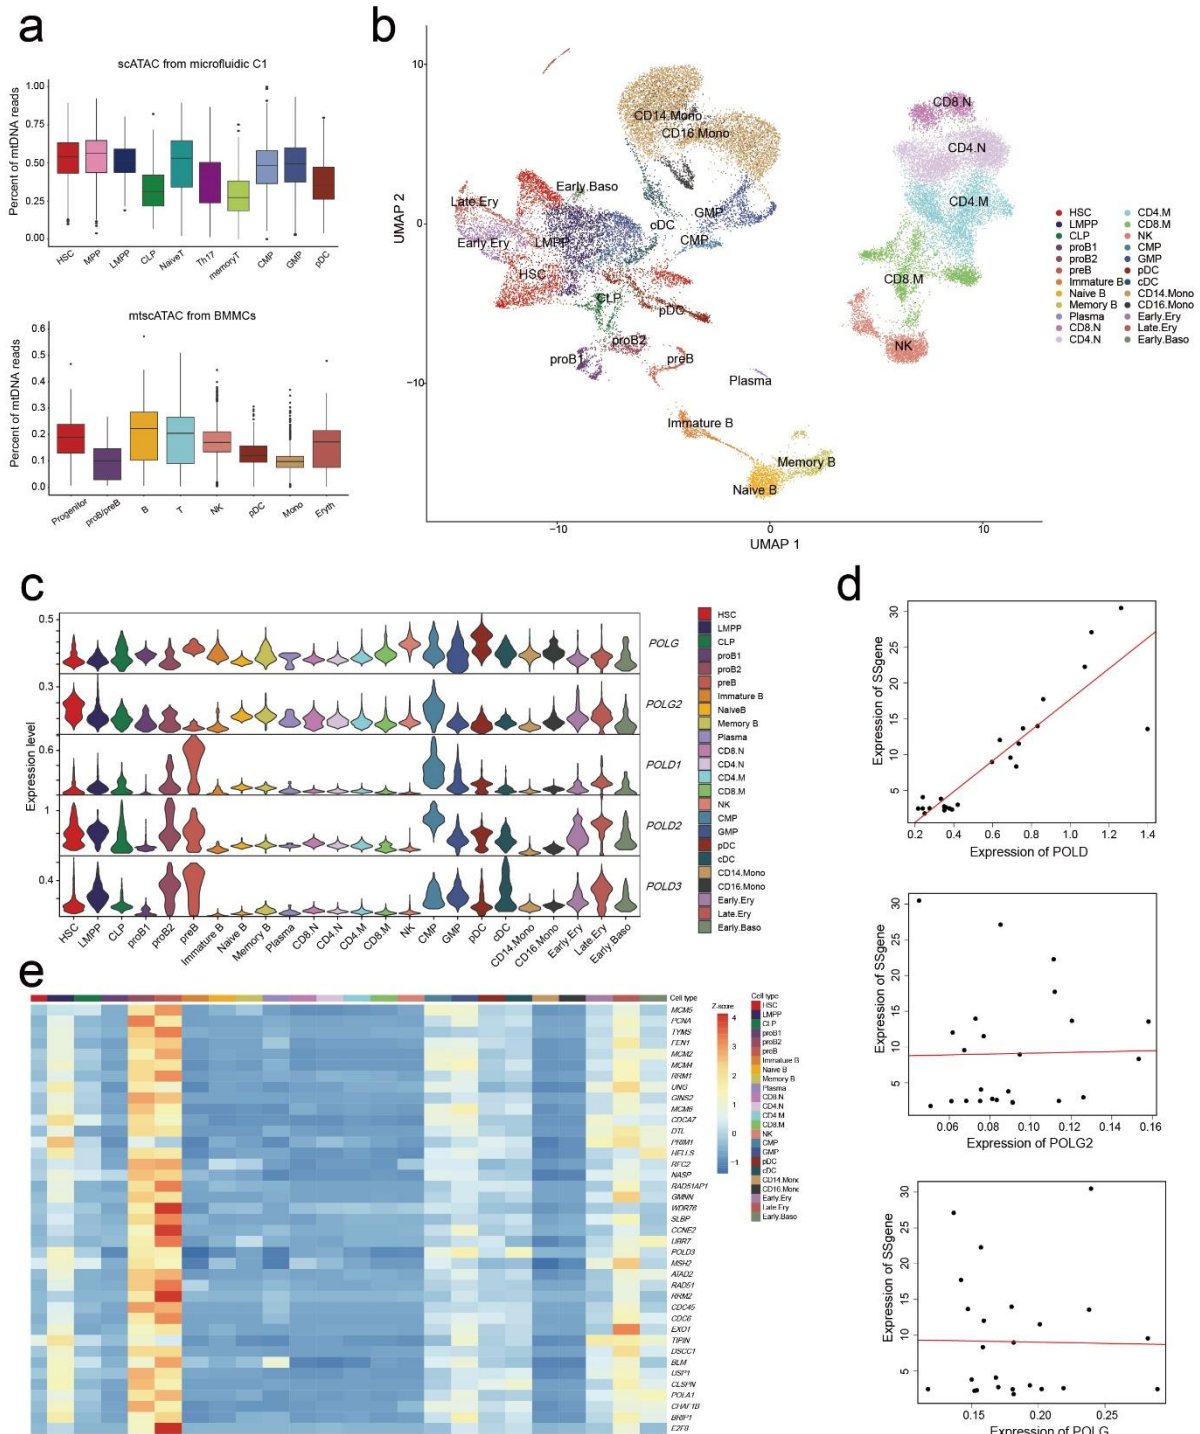

557

558 **Extended Data Fig. 3 Gene expression of G1/S phase-specific genes in scRNA-**  
 559 **seq data.**

560 (a) Relative mtDNA copies were measured by the percentage of the sequencing reads  
 561 mapped to the mitochondrial genome out of the total number of reads for each cell  
 562 types.

563 (b) UMAP projection of PBMCs, BBMCs and CD34<sup>+</sup> PBMCs with scRNA-seq data.

- 564 Dots represent individual cells colored by cell types.
- 565 **(c)** Violin plots showing the expression of mitochondrial DNA polymerase  $\gamma$  (*POLG*)  
566 and its binding subunit (*POLG2*) and nuclear DNA replication polymerase genes  
567 (*POLD1–3*) from scRNA-seq data.
- 568 **(d)** Scatter plot showing the correlation of the gene expression of *POLD* (*POLD1–3*),  
569 *POLG* and *POLG2* with G1/S phase-specific genes (SSgene).
- 570 **(e)** Heat map showing the expression of 39 G1/S phase-specific genes in 24 cell types.

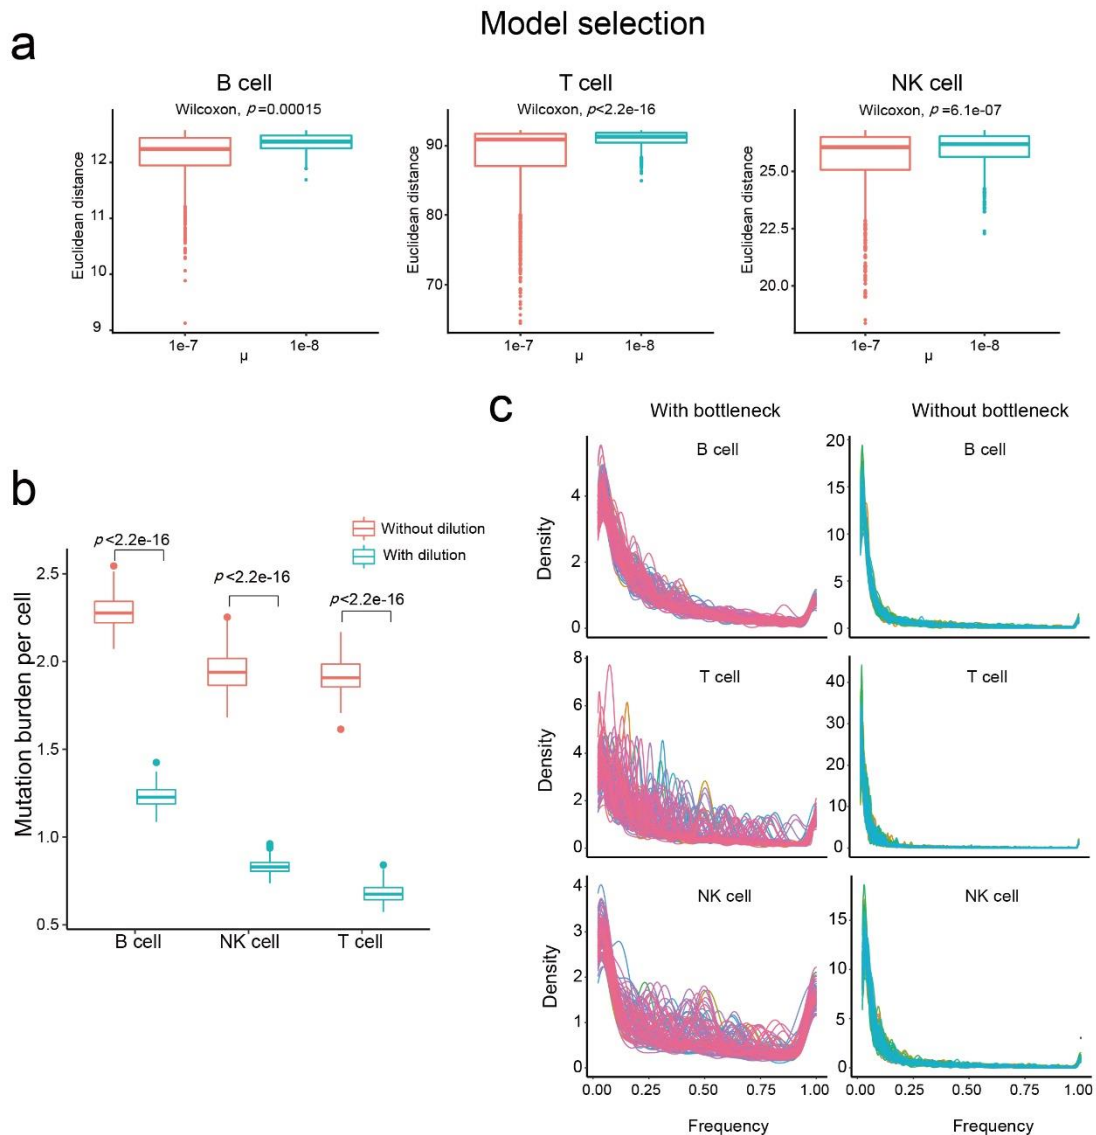

571

572 **Extended Data Fig. 4 Details regarding the parameter inference for the dilution**  
 573 **model of the mitochondrial genetic bottleneck.**

574 **(a)** Model selection with respect to the per-site mutation rate  $\mu$ . We ran the ABC  
 575 inference procedures for two mutation rates  $\mu=10^{-8}$  and  $10^{-7}$ , and  $\mu=10^{-7}$  fitted the data  
 576 better (smaller Euclidean distance between simulated and observed summary  
 577 statistics) in all cell types and thus was used for the parameter inference. **(b)**  
 578 Simulations under the dilution model of the mitochondrial genetic bottleneck with the  
 579 ABC-estimated parameter values recapitulated the lower mutation burden in B, T and  
 580 NK cells, as compared with simulations without a mitochondrial genetic bottleneck. **(c)**  
 581 Simulations (100 times) with inferred parameters from the dilution model under

582 conditions with or without a mitochondrial genetic bottleneck. Each curve represents  
583 one simulation.

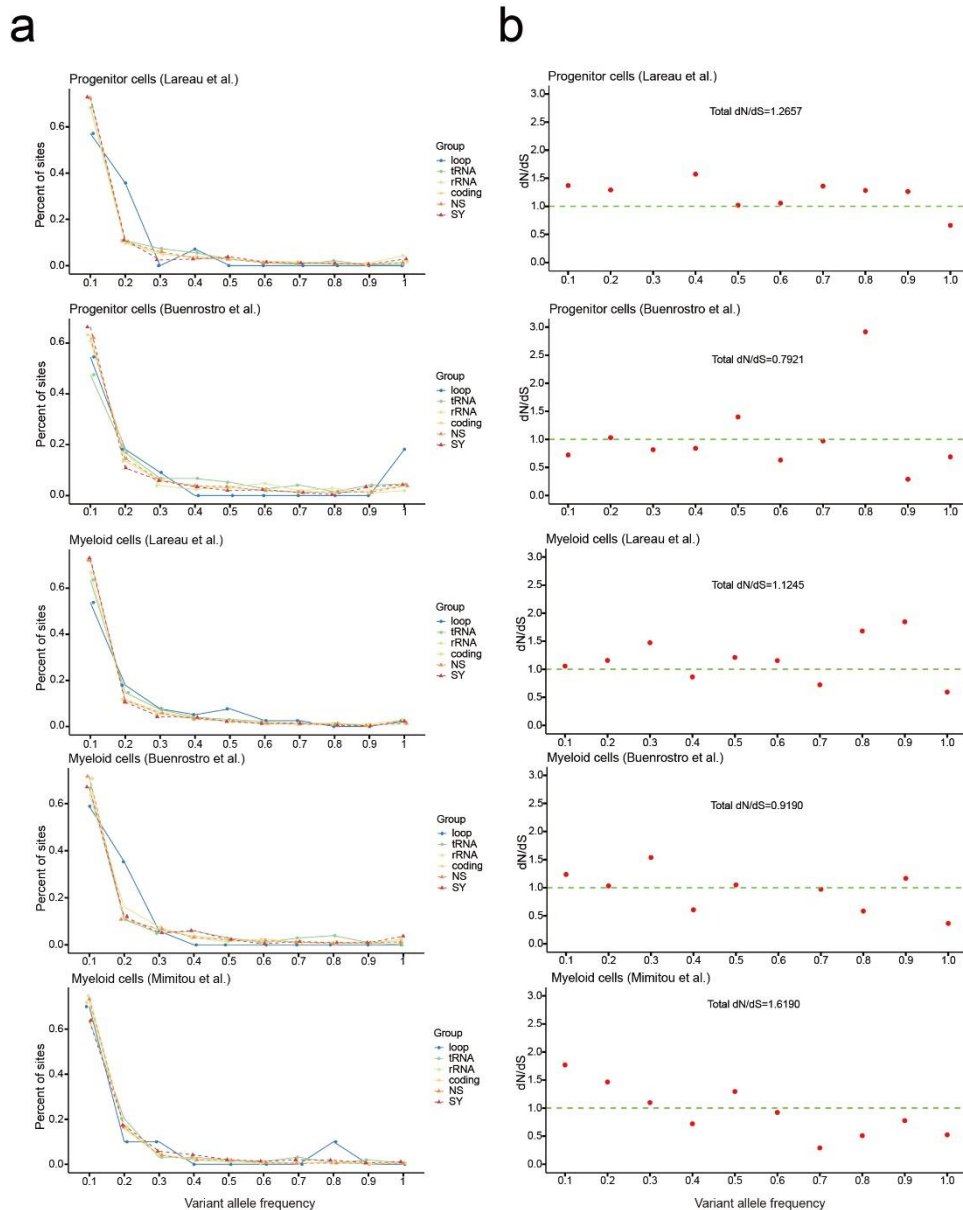

584

585 **Extended Data Fig. 5 Allele frequency spectrum of somatic mtDNA mutations for**  
 586 **different types and dN/dS in the progenitor and myeloid lineages.**

587 **(a)** Distribution of the VAF for mutations in different mtDNA genomic regions or types  
 588 in progenitor and myeloid cells. The color code corresponds to mtDNA genomic regions  
 589 or mutation types, annotated as loop, tRNA, rRNA, coding (coding region), NS (non-  
 590 synonymous) and SY (synonymous). **(b)** The dN/dS ratio (y-axis) for mutations in  
 591 different VAF bins (x-axis).

592



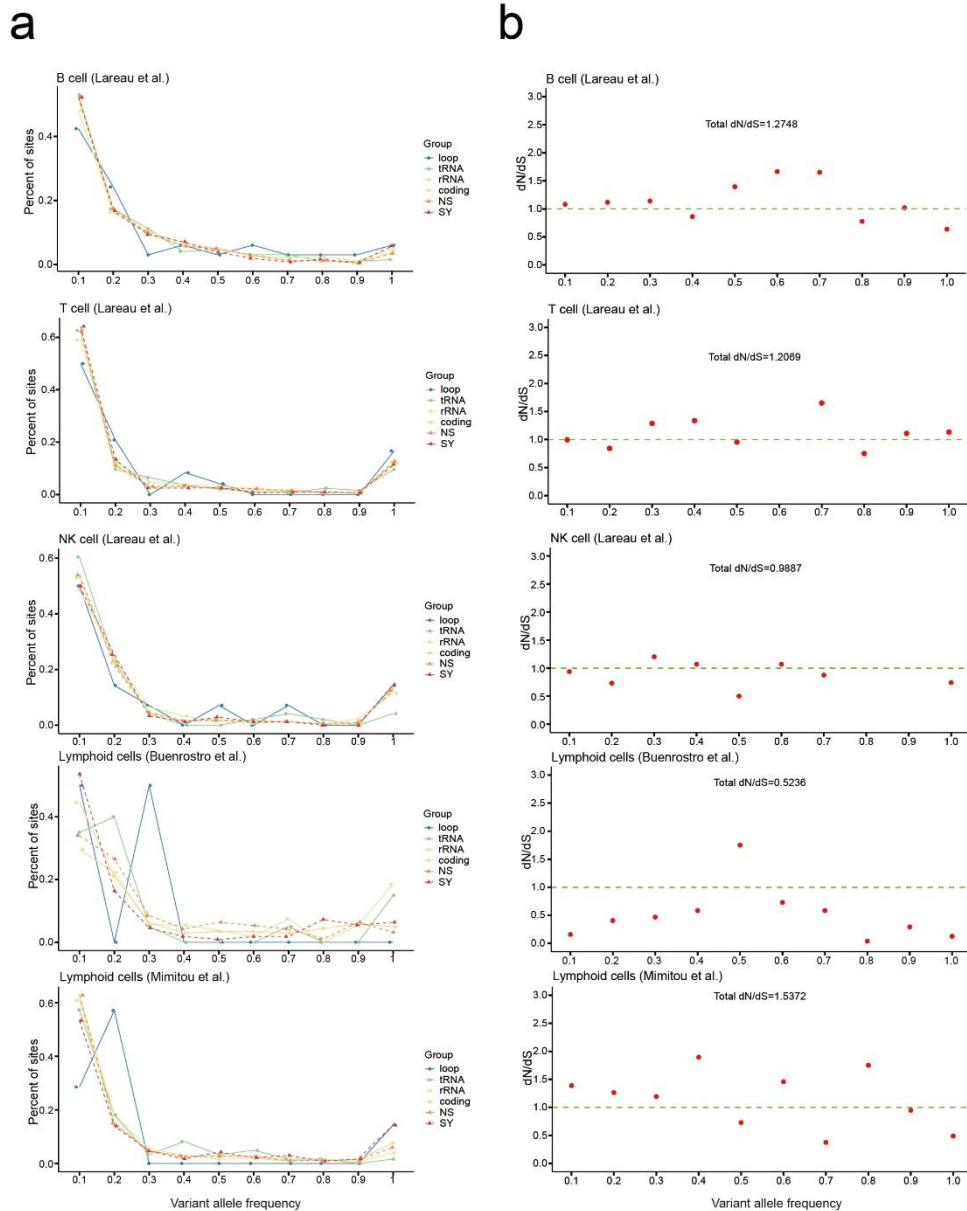

593

594 **Extended Data Fig. 6 Allele frequency spectrum of somatic mtDNA mutations for**  
 595 **different types and dN/dS in the lymphoid lineage.**

596 **(a)** Distribution of VAF for mutations in different mtDNA genomic regions in lymphoid  
 597 cells (B, T and NK). The color code corresponds to mtDNA genomic regions or mutation  
 598 types, annotated as loop, tRNA, rRNA, coding (coding region), NS (non-synonymous)  
 599 and SY (synonymous). **(b)** dN/dS ratio (y-axis) for mutations in different VAF bins (x-  
 600 axis).

601 **Supplementary Table 1**

**Table S1-DataResource**

| Cell Type                                     | DataSet     | library       | Platform              | # of cells | # of individuals | Notes                                                  | Author                 |
|-----------------------------------------------|-------------|---------------|-----------------------|------------|------------------|--------------------------------------------------------|------------------------|
| naive T cell                                  | GSE107816   | scATACseq+ C1 | Illumina NextSeq 500  | 96         | 1                | healthy                                                | Satpathy et al. 2018   |
| naive T cell (sample 2)                       | GSE107816   | scATACseq+ C1 | Illumina NextSeq 500  | 192        | 2                | healthy                                                | Satpathy et al. 2018   |
| memory T cell                                 | GSE107816   | scATACseq+ C1 | Illumina NextSeq 500  | 192        | 2                | healthy                                                | Satpathy et al. 2018   |
| Th17                                          | GSE107816   | scATACseq+ C1 | Illumina NextSeq 500  | 192        | 2                | healthy                                                | Satpathy et al. 2018   |
| Multipotent progenitor cell (MPP)             | GSE96769    | scATACseq+ C1 | Illumina NextSeq 500  | 192        | 2                | BM1077-frozen, BM0828-frozen                           | Buenrostro et al. 2018 |
| lymphoid-primed multipotent progenitor (LMPP) | GSE96769    | scATACseq+ C1 | Illumina NextSeq 500  | 96         | 1                | BM0828-frozen                                          | Buenrostro et al. 2018 |
| Common lymphoid progenitor (CLP)              | GSE96769    | scATACseq+ C1 | Illumina NextSeq 500  | 192        | 2                | BM1077-frozen, BM0828-frozen                           | Buenrostro et al. 2018 |
| Hematopoietic stem cell (HSC)                 | GSE96769    | scATACseq+ C1 | Illumina NextSeq 500  | 480        | 3                | BM1077-Frozen, BM0106-LS/SDM, BM0828-fresh/frozen      | Buenrostro et al. 2018 |
| Common myeloid progenitor (CMP)               | GSE96769    | scATACseq+ C1 | Illumina NextSeq 500  | 672        | 4                | BM1077-frozen-HYC, BM0828-frozen, BM1214-LS, BM1137-LS | Buenrostro et al. 2018 |
| Granulocyte-monocyte progenitors (GMP)        | GSE96769    | scATACseq+ C1 | Illumina NextSeq 500  | 288        | 3                | BM1077-frozen, BM0828, BM1214                          | Buenrostro et al. 2018 |
| Plasmacytoid dendritic cell (pDC)             | GSE96769    | scATACseq+ C1 | Illumina NextSeq 500  | 192        | 2                | BM1137-LS, BM1214-frozen                               | Buenrostro et al. 2018 |
| CD34+ hematopoietic cells, PBMCs              | GSE142745   | mtscATAC-seq  | NextSeq 550           | 22312      | 1                | healthy                                                | Lareau et al. 2020     |
| Effector Memory T(Tem)                        | E-MTAB-6072 | Smart-seq2    | Illumina HiSeq 2500   | 64         | 1                | healthy, organism part:colon                           | Ricardo et al. 2019    |
| Central Memory T(Tcm)                         | E-MTAB-6072 | Smart-seq2    | Illumina HiSeq 2500   | 61         | 1                | healthy, organism part:colon                           | Ricardo et al. 2019    |
| CD4+ regulatory(Treg)                         | E-MTAB-6072 | Smart-seq2    | Illumina HiSeq 2500   | 131        | 1                | healthy, organism part:colon                           | Ricardo et al. 2019    |
| PBMCs, BMMCs, CD34+ bone marrow cells         | GSE1139369  | CTH1-seq      | Illumina NovaSeq 6000 | 35434      | 4                | healthy                                                | Granja et al. 2019     |
| Bone marrow cells                             | GSM4732140  | mtscATAC-seq  | NextSeq 550           | 10327      | 1                | healthy                                                | Mimitou et al. 2020    |

602

603 **Supplementary Table 2**

| <b>TableS2 MarkerGenes(scATAC)</b> |                                             |
|------------------------------------|---------------------------------------------|
| <b>Celltype</b>                    | <b>Marker gene for cell type annotation</b> |
| HSC/MPP                            | <i>AVP,HLF,CRHBP</i>                        |
| LMPP                               | <i>FCN2,RUNX1</i>                           |
| CLP                                | <i>MME</i>                                  |
| proB                               | <i>RAG1,CD19,EBF1,IL7R</i>                  |
| preB                               | <i>RAG1,CD79B,MS4A1</i>                     |
| Naïve B                            | <i>IL4R,PAX5,MS4A1</i>                      |
| Memory B                           | <i>PAX5,MS4A1</i>                           |
| plasma                             | <i>TACI,BCMA,SDC1,IGKC</i>                  |
| Naïve CD4 <sup>+</sup> T           | <i>ITGA6,CCR7</i>                           |
| Naïve CD8 <sup>+</sup> T           | <i>CD8A,LEF1</i>                            |
| Memory CD4 <sup>+</sup> T          | <i>CD4,CD52</i>                             |
| Memory CD8 <sup>+</sup> T          | <i>CD8A,EOMES</i>                           |
| NK                                 | <i>GNLY,NKG7,FCGR3B,FASLG</i>               |
| CMP                                | <i>TAL1,GATA1</i>                           |
| GMP                                | <i>SPI1,MPO</i>                             |
| MDP                                | <i>FLT3,MPO</i>                             |
| pDC                                | <i>DERL3,FLT3</i>                           |
| Early.ery                          | <i>HBB,GATA1</i>                            |
| Late.ery                           | <i>GATA1</i>                                |
| Early.baso                         | <i>PF4,ITGA2B</i>                           |
| CD14mono                           | <i>NCRI,CEBPB</i>                           |
| CD16mono                           | <i>FCGR3A,SIGLEC10</i>                      |

604

605 **Supplementary Table 3**

| <b>TableS3 MarkerGene(scRNA)</b> |                                              |
|----------------------------------|----------------------------------------------|
| <b>Celltype</b>                  | <b>Marker genes for cell type annotation</b> |
| HSC/MPP                          | <i>AVP,HLF,CRHBP</i>                         |
| LMPP                             | <i>FCN2,RUNX1</i>                            |
| CLP                              | <i>MME,DNTT,IL7R</i>                         |
| proB                             | <i>VPREB3,CD79A,CD79B,RAG1</i>               |
| preB                             | <i>MS4A1,EBF1</i>                            |
| Immature B                       | <i>CR2,CD19</i>                              |
| Naïve B                          | <i>CD22</i>                                  |
| Memory B                         | <i>CD27,IL4R</i>                             |
| plasma                           | <i>TACI,BCMA,SDC1,IGKC</i>                   |
| Naive CD4 <sup>+</sup> T         | <i>SELL,CCR7,CD95</i>                        |
| Naive CD8 <sup>+</sup> T         | <i>LEF1,CD8A,IL2RB</i>                       |
| Memory CD4 <sup>+</sup> T        | <i>IL7R,CD52,CD4</i>                         |
| Memory CD8 <sup>+</sup> T        | <i>IFNG,EMOES</i>                            |
| NK                               | <i>GNLY,CCL5,CD56,NKG7</i>                   |
| CMP                              | <i>TAL1,MPO</i>                              |
| GMP/MDP                          | <i>ELANE,MPO,PRTN3,CSF1R</i>                 |
| pDC                              | <i>SPIB,DERL3,IRF8</i>                       |
| cDC                              | <i>CDC1,SPI1</i>                             |
| Early.ery                        | <i>HBB,GATA1</i>                             |
| Late.ery                         | <i>HBB,BLVRB</i>                             |
| Early.baso                       | <i>BCVRB , ITGA2B,PF4,LMO4</i>               |
| CD14mono                         | <i>CD14</i>                                  |
| CD16mono                         | <i>FCGR3A,SIGLEC10</i>                       |

606

607 **REFERENCE**

608

- 609 1. Andersson, S. *et al.* Sequence and organization of the human mitochondrial genome.  
610 *Nature* **290**, 457-465 (1981).
- 611 2. Hagström, E., Freyer, C., Battersby, B.J., Stewart, J.B. & Larsson, N.G. No  
612 recombination of mtDNA after heteroplasmy for 50 generations in the mouse maternal  
613 germline. *Nucleic Acids Research* **42**, 1111–1116 (2014).
- 614 3. Kazak, L., Reyes, A. & Holt, I.J. Minimizing the damage: Repair pathways keep  
615 mitochondrial DNA intact. *Nature Reviews Molecular Cell Biology* **13**, 659–671 (2012).
- 616 4. Scheibye-Knudsen, M., Fang, E.F., Croteau, D.L., Wilson, D.M., 3rd & Bohr, V.A.  
617 Protecting the mitochondrial powerhouse. *Trends Cell Biol* **25**, 158-70 (2015).
- 618 5. Lagouge, M. & Larsson, N.G. The role of mitochondrial DNA mutations and free  
619 radicals in disease and ageing. *J Intern Med* **273**, 529-43 (2013).
- 620 6. Ye, K., Lu, J., Ma, F., Keinan, A. & Gu, Z. Extensive pathogenicity of mitochondrial  
621 heteroplasmy in healthy human individuals. *Proceedings of the National Academy of*  
622 *Sciences of the United States of America* **111**, 10654–10659 (2014).
- 623 7. Felsenstein, J. The evolutionary advantage of recombination. *Genetics* **78**, 737-56  
624 (1974).
- 625 8. Koehler, C.M. *et al.* Replacement of bovine mitochondrial DNA by a sequence variant  
626 within one generation. *Genetics* **129**, 247-55 (1991).
- 627 9. Jenuth, J.P., Peterson, A.C., Fu, K. & Shoubridge, E.A. Random genetic drift in the  
628 female germline explains the rapid segregation of mammalian mitochondrial DNA. *Nat*  
629 *Genet* **14**, 146-51 (1996).
- 630 10. Ghosh, S.S., Fahy, E., Bodis-Wollner, I., Sherman, J. & Howell, N. Longitudinal study  
631 of a heteroplasmic 3460 Leber hereditary optic neuropathy family by multiplexed  
632 primer-extension analysis and nucleotide sequencing. *Am J Hum Genet* **58**, 325-34  
633 (1996).
- 634 11. Zhang, R., Wang, Y., Ye, K., Picard, M. & Gu, Z. Independent impacts of aging on  
635 mitochondrial DNA quantity and quality in humans. *BMC Genomics* **18**, 890 (2017).
- 636 12. Taylor, R.W. & Turnbull, D.M. Mitochondrial DNA mutations in human disease. *Nat*  
637 *Rev Genet* **6**, 389-402 (2005).
- 638 13. Ju, Y.S. *et al.* Origins and functional consequences of somatic mitochondrial DNA  
639 mutations in human cancer. *Elife* **3**(2014).
- 640 14. Ludwig, L.S. *et al.* Lineage Tracing in Humans Enabled by Mitochondrial Mutations  
641 and Single-Cell Genomics. *Cell* **176**, 1325–1339.e22 (2019).
- 642 15. Xu, J. *et al.* Single-cell lineage tracing by endogenous mutations enriched in transposase  
643 accessible mitochondrial DNA. *eLife* **8**, e45105 (2019).
- 644 16. Walker, M.A. *et al.* Purifying Selection against Pathogenic Mitochondrial DNA in  
645 Human T Cells. *New England Journal of Medicine* (2020).
- 646 17. Lareau, C.A. *et al.* Massively parallel single-cell mitochondrial DNA genotyping and  
647 chromatin profiling. *Nat Biotechnol* **39**, 451-461 (2021).
- 648 18. Mimitou, E.P. *et al.* Scalable, multimodal profiling of chromatin accessibility, gene  
649 expression and protein levels in single cells. *Nat Biotechnol* (2021).
- 650 19. Radsak, K. & Schutz, E. Changes of mitochondrial DNA polymerase-gamma activity

- 651 in synchronized mouse cell cultures. *Eur J Biochem* **89**, 3-9 (1978).
- 652 20. Chatre, L. & Ricchetti, M. Prevalent coordination of mitochondrial DNA transcription  
653 and initiation of replication with the cell cycle. *Nucleic Acids Res* **41**, 3068-78 (2013).
- 654 21. Sasaki, T., Sato, Y., Higashiyama, T. & Sasaki, N. Live imaging reveals the dynamics  
655 and regulation of mitochondrial nucleoids during the cell cycle in Fucci2-HeLa cells.  
656 *Sci Rep* **7**, 11257 (2017).
- 657 22. O'Hara, R. et al. Quantitative mitochondrial DNA copy number determination using  
658 droplet digital PCR with single-cell resolution. *Genome Res* **29**, 1878-1888 (2019).
- 659 23. Coller, H.A. et al. High frequency of homoplasmic mitochondrial DNA mutations in  
660 human tumors can be explained without selection. *Nature Genetics* **28**, 147–150 (2001).
- 661 24. Chen, B. et al. Tumorigenesis as the Paradigm of Quasi-neutral Molecular Evolution.  
662 *Mol Biol Evol* **36**, 1430-1441 (2019).
- 663 25. Lee, C., Yen, K. & Cohen, P. Humanin: a harbinger of mitochondrial-derived peptides?  
664 *Trends Endocrinol Metab* **24**, 222-8 (2013).
- 665 26. Lott, M.T. et al. mtDNA Variation and Analysis Using Mitomap and Mitomaster. *Curr*  
666 *Protoc Bioinformatics* **44**, 1 23 1-26 (2013).
- 667 27. Park, J. et al. Mitochondrial gene mutations in pediatric septic shock. *Pediatr Res* (2021).
- 668 28. Starr, T.K., Jameson, S.C. & Hogquist, K.A. Positive and negative selection of T cells.  
669 *Annu Rev Immunol* **21**, 139-76 (2003).
- 670 29. Buck, M.D. et al. Mitochondrial Dynamics Controls T Cell Fate through Metabolic  
671 Programming. *Cell* **166**, 63-76 (2016).
- 672 30. Chao, T., Wang, H. & Ho, P.C. Mitochondrial Control and Guidance of Cellular  
673 Activities of T Cells. *Front Immunol* **8**, 473 (2017).
- 674 31. Maciver, N.J., Michalek, R.D. & Rathmell, J.C. Metabolic regulation of T lymphocytes.  
675 *Annual Review of Immunology* **31**, 259–283 (2013).
- 676 32. Sena, L.A. et al. Mitochondria Are Required for Antigen-Specific T Cell Activation  
677 through Reactive Oxygen Species Signaling. *Immunity* **38**, 225–236 (2013).
- 678 33. West, A.P. & Shadel, G.S. Mitochondrial DNA in innate immune responses and  
679 inflammatory pathology. *Nat Rev Immunol* **17**, 363-375 (2017).
- 680 34. Angajala, A. et al. Diverse Roles of Mitochondria in Immune Responses: Novel Insights  
681 Into Immuno-Metabolism. *Front Immunol* **9**, 1605 (2018).
- 682 35. Lee, J.W. et al. Integrated analysis of plasma and single immune cells uncovers  
683 metabolic changes in individuals with COVID-19. *Nat Biotechnol* (2021).
- 684 36. Waters, L.R., Ahsan, F.M., Wolf, D.M., Shirihai, O. & Teitell, M.A. Initial B Cell  
685 Activation Induces Metabolic Reprogramming and Mitochondrial Remodeling.  
686 *iScience* **5**, 99-109 (2018).
- 687 37. Satpathy, A.T. et al. Transcript-indexed ATAC-seq for precision immune profiling.  
688 *Nature Medicine* **24**, 1 (2018).
- 689 38. Butler, A., Hoffman, P., Smibert, P., Papalexi, E. & Satija, R. Integrating single-cell  
690 transcriptomic data across different conditions, technologies, and species. *Nat*  
691 *Biotechnol* **36**, 411-420 (2018).
- 692 39. Granja, J.M. et al. Single-cell multiomic analysis identifies regulatory programs in  
693 mixed-phenotype acute leukemia. *Nat Biotechnol* **37**, 1458-1465 (2019).
- 694 40. Miragaia, R.J. et al. Single-Cell Transcriptomics of Regulatory T Cells Reveals  
695 Trajectories of Tissue Adaptation. *Immunity* **50**, 493-504 e7 (2019).

- 696 41. Granja, J.M. et al. ArchR is a scalable software package for integrative single-cell  
697 chromatin accessibility analysis. *Nat Genet* 53, 403-411 (2021).
- 698 42. Zhang, Y. et al. Model-based analysis of ChIP-Seq (MACS). *Genome Biol* 9, R137  
699 (2008).
- 700 43. McKenna, A. et al. The Genome Analysis Toolkit: a MapReduce framework for  
701 analyzing next-generation DNA sequencing data. *Genome Res* 20, 1297-303 (2010).
- 702 44. Koboldt, D.C. et al. VarScan 2: somatic mutation and copy number alteration discovery  
703 in cancer by exome sequencing. *Genome Res* 22, 568-76 (2012).
- 704 45. Buenrostro, J.D. et al. Integrated Single-Cell Analysis Maps the Continuous Regulatory  
705 Landscape of Human Hematopoietic Differentiation. *Cell* 173, 1535–1548.e16 (2018).
- 706 46. van Dijk, D. et al. Recovering Gene Interactions from Single-Cell Data Using Data  
707 Diffusion. *Cell* 174, 716-729 e27 (2018).
- 708 47. Trapnell, C. et al. The dynamics and regulators of cell fate decisions are revealed by  
709 pseudotemporal ordering of single cells. *Nat Biotechnol* 32, 381-386 (2014).
- 710 48. Qiu, X. et al. Reversed graph embedding resolves complex single-cell trajectories. *Nat*  
711 *Methods* 14, 979-982 (2017).
- 712 49. Cao, J. et al. The single-cell transcriptional landscape of mammalian organogenesis.  
713 *Nature* 566, 496-502 (2019).
- 714 50. Tirosh, I. et al. Dissecting the multicellular ecosystem of metastatic melanoma by  
715 single-cell RNA-seq. *Science* 352, 189-96 (2016).
- 716 51. Dobin, A. et al. STAR: ultrafast universal RNA-seq aligner. *Bioinformatics* 29, 15-21  
717 (2013).
- 718 52. Wang, K., Li, M. & Hakonarson, H. ANNOVAR: functional annotation of genetic  
719 variants from high-throughput sequencing data. *Nucleic Acids Res* 38, e164 (2010).
- 720 53. Yang, Z. PAML 4: phylogenetic analysis by maximum likelihood. *Mol Biol Evol* 24,  
721 1586-91 (2007).
- 722 54. Wilton, P.R., Zaidi, A., Makova, K. & Nielsen, R. A Population Phylogenetic View of  
723 Mitochondrial Heteroplasmy. *Genetics* 208, 1261-1274 (2018).
- 724 55. Cabrera, V.M. Human molecular evolutionary rate, time dependency and transient  
725 polymorphism effects viewed through ancient and modern mitochondrial DNA  
726 genomes. *Sci Rep* 11, 5036 (2021).
- 727 56. Tavaré, S., Balding, D.J., Griffiths, R.C. & Donnelly, P. Inferring coalescence times  
728 from DNA sequence data. *Genetics* 145, 505-18 (1997).
- 729 57. Beaumont, M.A., Zhang, W. & Balding, D.J. Approximate Bayesian computation in  
730 population genetics. *Genetics* 162, 2025-35 (2002).
- 731 58. Zhao, J., Siegmund, K.D., Shibata, D. & Marjoram, P. Ancestral inference in tumors:  
732 how much can we know? *J Theor Biol* 359, 136-45 (2014).
- 733 59. Csilléry, K., François, O. & Blum, M.G. abc: an R package for approximate Bayesian  
734 computation (ABC). *Methods in ecology and evolution* 3, 475-479 (2012).
